# Supplementary material
Source: Royal Society of Chemistry journal article supplement (doi:10.1039/d6ay00203j)
Supplement: d6ay00203j1.pdf [file d6ay00203j1.pdf]

## Supplementary Information

MANUSCRIPT TITLE: Acetonitrile-driven interface force field reconstruction of  
HLB-SPME: Insight into pesticide adsorption mechanism  
based on energy lattice point models

AUTHORS: Shuang Lei <sup>a1</sup>; Lulu Pu <sup>a1</sup>; Xinrong Chen <sup>a</sup>; Chaoxuan Liao<sup>b</sup> ;  
Yanping Fu <sup>a</sup> ; Jiahao Xu <sup>a</sup>; Yi Gao <sup>a</sup> ; Mengran Wang <sup>a</sup>;  
Zhoubing Huang <sup>a\*</sup>; Dali Sun <sup>a\*</sup>

ADDRESS: <sup>a</sup>The Key Laboratory of Environmental Pollution  
Monitoring and Disease Control, Ministry of Education,  
School of Public Health, Guizhou Medical University,  
Guian New Area, 561113, China; <sup>b</sup> Guizhou Academy  
of Testing and Analysis, Guiyang 550000, China

FIGURES: 3

TABLES: 5

NO. OF PAGES: 93

Table S1. Instrument parameters for the 125 analytes

| Compound             | Retention time<br>(t/min) | Q1/Q3 (m/z)       | DP  | CE    |
|----------------------|---------------------------|-------------------|-----|-------|
| acetochlor           | 9.02                      | 270.1/224.1/148.1 | 50  | 15/22 |
| alachlor             | 9.21                      | 270.1/238.1/162.1 | 50  | 13/28 |
| albendazole          | 4.96                      | 266.1/234.1/192   | 60  | 28/38 |
| azinphos-methyl      | 6.06                      | 318/132/125       | 58  | 22/33 |
| chlorpyrifos         | 19.02                     | 349.9/197.9/97    | 75  | 28/45 |
| Coumaphos            | 12.46                     | 363/307/227       | 100 | 23/35 |
| disulfoton           | 13.44                     | 275/89/61         | 50  | 17/46 |
| diuron               | 5.51                      | 233/72/46         | 50  | 37/34 |
| ethoprophos          | 9.08                      | 243.1/130.9/97    | 67  | 26/43 |
| malathion            | 7.9                       | 331/127/99        | 70  | 16/32 |
| phosalone            | 13.57                     | 368/322/182       | 76  | 13/20 |
| propanil             | 6.75                      | 218/162/127       | 71  | 21/37 |
| thiabendazole        | 3.04                      | 202/175/131.1     | 100 | 34/43 |
| myclobutanil         | 8.47                      | 289.1/125/70      | 80  | 46/35 |
| pyridaphenthion      | 8.62                      | 341.1/205/189.1   | 94  | 30/30 |
| fonofos              | 11.49                     | 247/137/109       | 50  | 14/25 |
| malaaxon             | 4.21                      | 315.1/127/99      | 70  | 16/31 |
| demeton-S-sulfone    | 3.45                      | 291/263/235       | 70  | 16/31 |
| disulfoton sulfone   | 11.84                     | 307/153/125       | 70  | 15/22 |
| disulfoton sulfoxide | 4.88                      | 291/213/185       | 60  | 12/17 |
| formothion           | 4.99                      | 258/199/125       | 50  | 12/32 |
| phorate sulfoxide    | 4.88                      | 277/199/153       | 25  | 13/19 |
| phorate sulfone      | 5.1                       | 293/115/97        | 65  | 35/50 |

|                     |       |                   |     |       |
|---------------------|-------|-------------------|-----|-------|
| phenthoate          | 11.21 | 321/163.1/79.1    | 51  | 17/51 |
| sulfotep            | 11.59 | 323/171.1/115     | 70  | 19/40 |
| chlorpyrifos-methyl | 13.83 | 323.9/125.1       | 65  | 28    |
| terbutylazine       | 6.86  | 230.1/174.1/104   | 40  | 23/41 |
| phenmedipham        | 6.34  | 301.1/168.1/136   | 70  | 11/29 |
| terbufos sulfoxide  | 6.53  | 305/187/130.9     | 57  | 20/38 |
| quinalphos          | 10.65 | 299.1/163/147.1   | 77  | 31/29 |
| cyanazine           | 3.91  | 241.1/214.1/104   | 60  | 24/40 |
| fenamiphos          | 10.77 | 304.1/217/202     | 90  | 31/47 |
| propyzamide         | 7.53  | 256/190/173       | 67  | 19/31 |
| triazophos          | 8.83  | 314.1/162.1/119.1 | 80  | 24/50 |
| iprobenfos          | 11.02 | 289.1/205/91.1    | 40  | 13/30 |
| ethofumesate        | 6.8   | 287.1/259.1/121.1 | 80  | 12/20 |
| diflubenzuron       | 10.72 | 311/158/141       | 45  | 20/49 |
| etrimfos            | 11.2  | 293.1/265/125     | 80  | 26/34 |
| pendimethalin       | 19.04 | 282.1/212.1/194.1 | 40  | 15/28 |
| isazofos            | 8.4   | 316/164/122       | 70  | 23/35 |
| triadimefon         | 8.08  | 294.1/225.1/119.1 | 70  | 17/21 |
| isoprothiolane      | 7.73  | 291.1/231/198     | 65  | 16/30 |
| mepronil            | 7.88  | 270.1/228.1/119   | 60  | 20/32 |
| terbufos sulfone    | 6.56  | 321/115/97        | 75  | 39/57 |
| metalaxyl           | 5.34  | 280.2/220.1/192.1 | 75  | 18/24 |
| fenarimol           | 9.25  | 331/268.1/259     | 90  | 31/34 |
| fenoxaprop-ethyl    | 16.98 | 362.1/228/244.1   | 60  | 24/32 |
| fluazifop-butyl     | 18.17 | 384.1/328.1/282   | 105 | 24/29 |
| oxadixyl            | 3.8   | 279.1/219.1/132.1 | 68  | 17/41 |

|                     |       |                     |     |       |
|---------------------|-------|---------------------|-----|-------|
| bensulfuron-methyl  | 6.42  | 411.1/182.1/149.1   | 40  | 26    |
| chlorimuron-ethyl   | 8.06  | 415/186/121         | 40  | 25/24 |
| lactofen            | 19.19 | 479.1/344/223       | 40  | 21/48 |
| heptenophos         | 5.57  | 251/127/125         | 65  | 20/18 |
| lufenuron           | 20.22 | 511/158/141         | 100 | 20/60 |
| prochloraz          | 10.51 | 376.2/308/266       | 50  | 15/22 |
| flusilazole         | 10.89 | 316.1/247.1/165.1   | 50  | 26/37 |
| tebuconazole        | 11.93 | 308.2/125/70        | 95  | 47/49 |
| fenbuconazole       | 10.75 | 337.1/125/70        | 95  | 42/43 |
| metconazole         | 13.2  | 320.2/125/70        | 75  | 56/62 |
| ipconazole          | 16.04 | 334.2/125/70        | 40  | 59/57 |
| carfentrazone-ethyl | 11.49 | 412/366/346.1       | 95  | 24/32 |
| dimethomorph        | 8.02  | 388.1/301.1/165.1   | 105 | 29/43 |
| cyprodinil          | 6.66  | 226.1/108.1/93.1    | 96  | 35/50 |
| sulfentrazone       | 4.43  | 387/307/146         | 100 | 29/57 |
| thifluzamide        | 10.5  | 528.8/488.8/148     | 100 | 38/60 |
| flufenacet          | 9.45  | 364.1/194.1/152.1   | 70  | 16/27 |
| pyrimethanil        | 5.5   | 200.1/183.1/168.1   | 60  | 33/40 |
| pencycuron          | 14.26 | 329.1/218.1/125     | 100 | 21/35 |
| fenpropidin         | 6.01  | 274.3/147.1/117.1   | 40  | 39/69 |
| chlorfluazuron      | 21.07 | 540/384.9/382.9/158 | 100 | 30/20 |
| diflufenican        | 16    | 395.1/266/246       | 60  | 34/46 |
| dimethenamid        | 6.78  | 276.1/244.1/168.1   | 60  | 20/33 |
| cadusafos           | 14.11 | 271.1/159/131       | 40  | 19/31 |
| flurtamone          | 7.05  | 334.1/303.1/247.1   | 50  | 20/30 |
| halosulfuron-methyl | 9.03  | 435/182.1/139.1     | 40  | 24/62 |

|                       |       |                   |        |       |
|-----------------------|-------|-------------------|--------|-------|
| flufenoxuron          | 20.98 | 489/158/141       | 71     | 27/65 |
| tebufenozide          | 10.99 | 353.2/297.2/133.1 | 65     | 11/24 |
| triflusulfuron-methyl | 8.25  | 493.1/461.1/264.1 | 40     | 18/30 |
| imibenconazole        | 19.01 | 411/171/125       | 50     | 25/50 |
| novaluron             | 18.5  | 493/158.1/141     | 91     | 27/69 |
| fluthiacet-methyl     | 7.05  | 404/344/274       | 40     | 31/39 |
| zoxamide              | 12.08 | 336/204/187       | 90     | 23/31 |
| isofenphos-methyl     | 8.44  | 332.1/231/121     | 50     | 19/43 |
| pyribenzoxim          | 19.08 | 610.2/413.1/180.1 | 50     | 17/48 |
| dinotefuran           | 2.66  | 203.1/157.1/129.1 | 65     | 11/16 |
| boscalid              | 7.5   | 343/307.1/140     | 100    | 28/27 |
| famoxadone            | 13.77 | 392.2/331.1/238.1 | 65     | 12/24 |
| prochloraz metabolite | 12.72 | 325/282/129.1     | 90.000 | 21/25 |
| thiophanate-methyl    | 4.14  | 343.1/311/151     | 60.000 | 15/26 |
| nitenpyram            | 2.79  | 271.1/225.1/99    | 70.000 | 16/22 |
| benazolin-ethyl       | 6.39  | 272/198/170       | 65.000 | 20/33 |
| methacrifos           | 5.87  | 241/209/125       | 58.000 | 11/25 |
| pyrethrin I           | 20.75 | 329.2/161.2/133.1 | 75.000 | 13/22 |
| methoprene            | 21.84 | 279/237/191       | 60.000 | 9/11  |
| monocrotophos         | 3.04  | 224.1/127/98.1    | 60.000 | 21/17 |
| thiamethoxam          | 2.98  | 292/211.1/181.1   | 60.000 | 16/30 |
| pyraclostrobin        | 13.62 | 388.1/194.1/163.1 | 50.000 | 18/36 |
| metrafenone           | 13.84 | 409.1/227/209.1   | 71.000 | 27/21 |
| triticonazole         | 9.42  | 318.1/125/70      | 80.000 | 51/46 |
| cyazofamid            | 10.1  | 325.1/261.1/108   | 70.000 | 15/20 |
| silthiofam            | 10.75 | 268.1/252.1/139   | 60.000 | 12/24 |

|                                  |       |                   |         |       |
|----------------------------------|-------|-------------------|---------|-------|
| tolfenpyrad                      | 18.87 | 384.1/197.1/171   | 40.000  | 35/33 |
| amisulbrom                       | 16.71 | 466/227/148.1     | 90.000  | 27/64 |
| proquinazid                      | 20.36 | 373/331/288.9     | 80.000  | 31/21 |
| fluopyram                        | 9.07  | 397.1/208/173     | 60.000  | 30/40 |
| flubendiamide                    | 12.81 | 705/571/531       | 150.000 | 45/55 |
| fenoxanil                        | 10.55 | 329.1/302.1/86.1  | 78.000  | 16/25 |
| picoxystrobin                    | 11.2  | 368.1/205.1/145.1 | 54.000  | 13/27 |
| pyrisoxazole                     | 4.23  | 289.1/151.1/120   | 50.000  | 20/30 |
| cyantraniliprole                 | 4.71  | 474/444/285.9     | 60.000  | 27/18 |
| metaflumizone                    | 20.15 | 507.1/287.1/178   | 80.000  | 33/32 |
| trifloxystrobin                  | 16.06 | 409.1/186.1/145   | 40.000  | 23/63 |
| penflufen                        | 11.32 | 318.2/234.1/141   | 100.000 | 22/37 |
| sedaxane                         | 8.71  | 332.2/292.1/159   | 40.000  | 20/25 |
| triflumizole<br>metabolite       | 3.95  | 295/215/195       | 90.000  | 31/38 |
| ametoctradin                     | 14.2  | 276.2/176.1/149   | 40.000  | 51/50 |
| fluxapyroxad                     | 8.24  | 382.1/362.1/342.1 | 90.000  | 20/28 |
| propaquizafop                    | 18.13 | 444.1/371.1/100.1 | 100.000 | 19/21 |
| coumoxystrobin                   | 19.26 | 437.2/205.1/145.1 | 65.000  | 12/34 |
| spirotetramat-enol               | 4.83  | 302.2/270.1/216.1 | 60.000  | 27/38 |
| prochloraz metabolite            | 12.72 | 325/282/129.1     | 90.000  | 21/25 |
| enestroburin                     | 18.19 | 400.1/178/137     | 45.000  | 20/38 |
| spirotetramat-keto-<br>hydroxy   | 5.86  | 318.2/300.2/214.1 | 70.000  | 18/37 |
| spirotetramat-enol-<br>glucoside | 3.18  | 464.2/302.2/216.1 | 60.000  | 24/61 |
| clethodim sulfone                | 5.96  | 392.1/300.1/164.1 | 60.000  | 20/37 |

Table S2. the Log P, K values of the compounds used for the correlation study

| Number | Compound             | Log P | K <sub>w</sub> | K <sub>w-s</sub> |
|--------|----------------------|-------|----------------|------------------|
| 1      | acetochlor           | 3.32  | 2.200          | 5.560            |
| 2      | alachlor             | 3.43  | 1.1497         | 9.780            |
| 3      | albendazole          | 3.07  | 1.118          | 13.745           |
| 4      | azinphos-methyl      | 2.93  | 1.893          | 10.873           |
| 5      | chlorpyrifos         | 4.60  | 1.755          | 7.440            |
| 6      | Coumaphos            | 3.89  | 1.653          | 8.267            |
| 7      | disulfoton           | 2.95  | 1.102          | 5.148            |
| 8      | diuron               | 2.48  | 0.946          | 11.644           |
| 9      | ethoprophos          | 3.23  | 1.821          | 9.791            |
| 10     | malathion            | 1.79  | 2.976          | 5.602            |
| 11     | phosalone            | 4.00  | 1.953          | 8.173            |
| 12     | propanil             | 2.95  | 1.005          | 6.443            |
| 13     | thiabendazole        | 2.15  | 0.998          | 12.549           |
| 14     | myclobutanil         | 3.72  | 1.125          | 5.705            |
| 15     | pyridaphenthion      | 2.69  | 1.167          | 6.173            |
| 16     | fonofos              | 3.41  | 1.471          | 15.509           |
| 17     | malaixon             | 0.89  | 1.821          | 10.576           |
| 18     | demeton-S-sulfone    | 1.04  | 1.882          | 9.459            |
| 19     | disulfoton sulfone   | 1.94  | 1.342          | 12.544           |
| 20     | disulfoton sulfoxide | 1.84  | 1.601          | 9.592            |
| 21     | formothion           | 0.26  | 2.032          | 10.306           |
| 22     | phorate sulfoxide    | 1.82  | 1.005          | 9.259            |
| 23     | phorate sulfone      | 1.92  | 1.102          | 16.681           |
| 24     | phenthoate           | 3.07  | 1.195          | 5.280            |
| 25     | sulfotep             | 2.59  | 0.973          | 7.383            |
| 26     | chlorpyrifos-methyl  | 3.90  | 1.101          | 5.727            |
| 27     | terbuthylazine       | 2.74  | 1.086          | 9.699            |
| 28     | phenmedipham         | 3.42  | 1.793          | 12.464           |

|    |                    |      |       |        |
|----|--------------------|------|-------|--------|
| 29 | terbufos sulfoxide | 2.41 | 1.113 | 5.958  |
| 30 | quinalphos         | 3.01 | 1.617 | 7.030  |
| 31 | cyanazine          | 2.34 | 0.803 | 16.997 |
| 32 | fenamiphos         | 3.05 | 0.975 | 9.889  |
| 33 | propyzamide        | 4.14 | 1.487 | 13.616 |
| 34 | triazophos         | 3.07 | 0.817 | 14.771 |
| 35 | iprobenfos         | 3.43 | 1.215 | 11.481 |
| 36 | ethofumesate       | 2.46 | 0.611 | 8.881  |
| 37 | diflubenzuron      | 3.47 | 1.905 | 5.309  |
| 38 | etrimfos           | 2.57 | 1.344 | 17.115 |
| 39 | pendimethalin      | 4.17 | 1.350 | 5.524  |
| 40 | isazofos           | 3.10 | 1.244 | 9.218  |
| 41 | triadimefon        | 3.64 | 1.692 | 4.845  |
| 42 | isoprothiolane     | 2.96 | 1.095 | 9.112  |
| 43 | mepronil           | 3.81 | 1.116 | 8.910  |
| 44 | terbufos sulfone   | 2.50 | 0.978 | 6.517  |
| 45 | metalaxyl          | 2.06 | 1.200 | 15.131 |
| 46 | fenarimol          | 3.83 | 1.578 | 6.222  |
| 47 | fenoxaprop-ethyl   | 4.65 | 1.091 | 8.050  |
| 48 | fluazifop-butyl    | 5.22 | 1.440 | 6.421  |
| 49 | oxadixyl           | 1.70 | 1.171 | 12.313 |
| 50 | bensulfuron-methyl | 1.85 | 1.443 | 8.872  |
| 51 | chlorimuron-ethyl  | 2.54 | 2.777 | 5.025  |
| 52 | lactofen           | 5.29 | 1.985 | 8.117  |
| 53 | heptenophos        | 0.86 | 1.109 | 15.211 |
| 54 | lufenuron          | 6.54 | 2.188 | 7.040  |
| 55 | prochloraz         | 4.41 | 2.265 | 8.030  |
| 56 | flusilazole        | 5.09 | 1.011 | 9.413  |
| 57 | tebuconazole       | 3.63 | 1.519 | 16.450 |

|    |                       |      |       |        |
|----|-----------------------|------|-------|--------|
| 58 | fenbuconazole         | 4.30 | 1.482 | 5.373  |
| 59 | metconazole           | 3.58 | 2.177 | 5.539  |
| 60 | ipconazole            | 4.01 | 1.486 | 6.079  |
| 61 | carfentrazone-ethyl   | 4.00 | 2.190 | 4.565  |
| 62 | dimethomorph          | 3.51 | 1.117 | 9.336  |
| 63 | cyprodinil            | 3.45 | 1.392 | 11.797 |
| 64 | sulfentrazone         | 2.26 | 1.216 | 8.501  |
| 65 | thifluzamide          | 6.61 | 1.640 | 10.619 |
| 66 | flufenacet            | 3.41 | 1.227 | 12.761 |
| 67 | pyrimethanil          | 2.69 | 1.052 | 12.337 |
| 68 | pencycuron            | 4.80 | 2.084 | 10.440 |
| 69 | fenpropidin           | 3.76 | 1.863 | 8.264  |
| 70 | chlorfluazuron        | 6.69 | 2.088 | 5.096  |
| 71 | diflufenican          | 4.92 | 1.305 | 7.633  |
| 72 | dimethenamid          | 2.23 | 1.081 | 15.374 |
| 73 | cadusafos             | 3.99 | 1.087 | 6.156  |
| 74 | flurtamone            | 4.01 | 0.823 | 13.258 |
| 75 | halosulfuron-methyl   | 1.49 | 2.910 | 10.614 |
| 76 | flufenoxuron          | 6.18 | 1.583 | 10.288 |
| 77 | tebufenozide          | 4.92 | 1.234 | 6.148  |
| 78 | triflusulfuron-methyl | 2.81 | 2.835 | 8.526  |
| 79 | imibenconazole        | 5.48 | 0.858 | 15.008 |
| 80 | novaluron             | 6.80 | 1.964 | 5.119  |
| 81 | fluthiacet-methyl     | 3.98 | 1.088 | 9.025  |
| 82 | zoxamide              | 4.29 | 2.819 | 15.548 |
| 83 | isofenphos-methyl     | 3.16 | 1.243 | 7.128  |
| 84 | pyribenzoxim          | 7.48 | 1.694 | 7.639  |
| 85 | dinotefuran           | 1.70 | 1.957 | 17.308 |
| 86 | boscalid              | 4.52 | 1.421 | 7.947  |

|     |                         |       |       |        |
|-----|-------------------------|-------|-------|--------|
| 87  | famoxadone              | 4.88  | 1.911 | 10.566 |
| 88  | prochloraz metabolite   | 3.87  | 1.405 | 5.151  |
| 89  | thiophanate-methyl      | 3.21  | 2.659 | 10.654 |
| 90  | nitenpyram              | -1.09 | 1.953 | 18.577 |
| 91  | benazolin-ethyl         | 2.82  | 0.932 | 15.913 |
| 92  | methacrifos             | 0.85  | 0.903 | 16.367 |
| 93  | pyrethrin I             | 4.51  | 1.155 | 13.772 |
| 94  | methoprene              | 5.06  | 1.103 | 13.144 |
| 95  | monocrotophos           | -0.63 | 2.153 | 17.094 |
| 96  | thiamethoxam            | 2.69  | 1.198 | 14.882 |
| 97  | pyraclostrobin          | 4.64  | 2.323 | 5.068  |
| 98  | metrafenone             | 4.89  | 2.477 | 11.140 |
| 99  | triticonazole           | 3.40  | 1.382 | 6.720  |
| 100 | cyazofamid              | 2.54  | 1.158 | 16.261 |
| 101 | silthiofam              | 3.63  | 0.891 | 6.110  |
| 102 | tolfenpyrad             | 5.22  | 1.403 | 4.540  |
| 103 | amisulbrom              | 2.23  | 1.033 | 7.594  |
| 104 | proquinazid             | 4.00  | 2.123 | 7.856  |
| 105 | fluopyram               | 4.48  | 1.019 | 6.530  |
| 106 | flubendiamide           | 5.30  | 1.616 | 7.167  |
| 107 | fenoxanil               | 4.06  | 0.949 | 17.868 |
| 108 | picoxystrobin           | 3.90  | 1.780 | 5.011  |
| 109 | pyrisoxazole            | 2.59  | 1.297 | 15.167 |
| 110 | cyantraniliprole        | 3.74  | 1.906 | 14.972 |
| 111 | metaflumizone           | 7.21  | 2.816 | 6.803  |
| 112 | trifloxystrobin         | 4.05  | 1.486 | 5.418  |
| 113 | penflufen               | 4.08  | 1.171 | 7.653  |
| 114 | sedaxane                | 3.56  | 1.260 | 6.157  |
| 115 | triflumizole metabolite | 3.12  | 1.311 | 15.215 |

|     |                              |      |       |        |
|-----|------------------------------|------|-------|--------|
| 116 | ametoctradin                 | 4.66 | 1.106 | 14.642 |
| 117 | fluxapyroxad                 | 4.28 | 2.052 | 6.229  |
| 118 | propaquizafop                | 4.05 | 1.095 | 14.747 |
| 119 | coumoxystrobin               | 5.47 | 2.017 | 6.765  |
| 120 | spirotetramat-enol           | 1.84 | 1.563 | 14.107 |
| 121 | prochloraz metabolite        | 3.78 | 1.048 | 14.546 |
| 122 | enestroburin                 | 4.12 | 2.330 | 9.162  |
| 123 | spirotetramat-keto-hydroxy   | 1.94 | 1.621 | 6.933  |
| 124 | spirotetramat-enol-glucoside | 0.61 | 1.802 | 14.882 |
| 125 | clethodim sulfone            | 1.40 | 1.539 | 8.787  |

$K_w$ : Adsorption coefficient of pesticides in pure water

$K_{w-s}$ : Adsorption coefficient of pesticides in aqueous solutions containing 1  $\mu\text{g/mL}$  acetonitrile

DP and CE values presented are the mean values.

Table S3 The coefficients and associated variables for the equation of Kw 2D QSPR.

| Coefficient          | Variable | Coefficient                   | Variable | Coefficient                   | Variable | Coefficient                   | Variable |
|----------------------|----------|-------------------------------|----------|-------------------------------|----------|-------------------------------|----------|
| ALogP                | 1.02E-05 | Count<ECFP_6:-<br>1100000244> | 1.11E-05 | Count<ECFP_6:86<br>4518973>   | -5.8E-06 | Count<ECFP_6:68<br>65857320>  | -1.6E-06 |
| Molecular_Weight     | 0.002307 | Count<ECFP_6:22<br>6796801>   | 5.04E-06 | Count<ECFP_6:-<br>1764455838> | 1.73E-06 | Count<ECFP_6:-<br>1072294614> | 4.57E-07 |
| Num_H_Donors         | 1.36E-05 | Count<ECFP_6:22<br>0735655>   | 1.45E-06 | Count<ECFP_6:-<br>175507738>  | 1.32E-06 | Count<ECFP_6:13<br>37040050>  | 3.49E-06 |
| Num_H_Acceptors      | 3.06E-05 | Count<ECFP_6:-<br>1236483485> | 8.49E-06 | Count<ECFP_6:-<br>992506539>  | -3.7E-07 | Count<ECFP_6:-<br>176494269>  | -4.6E-07 |
| Num_RotatableBonds   | 3.86E-05 | Count<ECFP_6:-<br>177077903>  | 3.02E-06 | Count<ECFP_6:-<br>167460056>  | -4.4E-07 | Count<ECFP_6:15<br>64392544>  | -1.6E-06 |
| Num_Rings            | 6.85E-06 | Count<ECFP_6:13<br>35691903>  | 7.69E-08 | Count<ECFP_6:21<br>06656448>  | 2.29E-06 | Count<ECFP_6:18<br>54732111>  | -8.5E-07 |
| Num_AromaticRings    | 6.22E-06 | Count<ECFP_6:19<br>96767644>  | 1.5E-07  | Count<ECFP_6:86<br>4909220>   | 8.08E-06 | Count<ECFP_6:18<br>41329970>  | 4.54E-07 |
| Molecular_Fractional | 1.66E-07 | Count<ECFP_6:-                | 4.35E-06 | Count<ECFP_6:-                | -1E-06   | Count<ECFP_6:67               | -1.6E-06 |

|                               |           |                              |          |                               |          |                               |          |
|-------------------------------|-----------|------------------------------|----------|-------------------------------|----------|-------------------------------|----------|
| PolarSurfaceArea              |           | 786013480>                   |          | 845108448>                    |          | 6555381>                      |          |
| Count<ECFP_6:-<br>817402818>  | 3.16E-07  | Count<ECFP_6:14<br>30169877> | 2.43E-06 | Count<ECFP_6:-<br>826638028>  | -1.8E-06 | Count<ECFP_6:-<br>677055651>  | 3.55E-08 |
| Count<ECFP_6:-<br>1046436026> | 4.34E-06  | Count<ECFP_6:19<br>97021792> | 3.48E-06 | Count<ECFP_6:67<br>2362763>   | -9E-07   | Count<ECFP_6:-<br>708878603>  | -1.5E-06 |
| Count<ECFP_6:-<br>1059365320> | 6.35E-06  | Count<ECFP_6:20<br>07300961> | 5.12E-06 | Count<ECFP_6:13<br>10520534>  | -3.1E-06 | Count<ECFP_6:-<br>1925046727> | 9.11E-07 |
| Count<ECFP_6:-<br>1074141656> | 7.59E-06  | Count<ECFP_6:15<br>59650422> | -7.1E-07 | Count<ECFP_6:-<br>1250439909> | -3.9E-06 | Count<ECFP_6:-<br>797085356>  | 1.22E-06 |
| Count<ECFP_6:-<br>1897341097> | 4.05E-06  | Count<ECFP_6:73<br>4603939>  | -3E-06   | Count<ECFP_6:83<br>4876373>   | -1.1E-06 | Count<ECFP_6:-<br>2024255407> | 3.39E-06 |
| Count<ECFP_6:6428<br>10091>   | -9.48E-07 | Count<ECFP_6:86<br>3188371>  | -2.6E-06 | Count<ECFP_6:-<br>949601813>  | -3.2E-06 | Count<ECFP_6:68<br>3445015>   | -1.1E-06 |
| Count<ECFP_6:-<br>1085223908> | 2.80E-06  | Count<ECFP_6:85<br>9796174>  | 2.73E-06 | Count<ECFP_6:-<br>830332112>  | -1.3E-06 | Count<ECFP_6:67<br>0515721>   | 3.64E-07 |
| Count<ECFP_6:-<br>182236392>  | 2.56E-06  | Count<ECFP_6:65<br>5739385>  | -1.7E-06 | Count<ECFP_6:14<br>33087471>  | -1.5E-07 | Count<ECFP_6:15<br>71214559>  | -1.8E-06 |

|                               |           |                              |        |                             |          |
|-------------------------------|-----------|------------------------------|--------|-----------------------------|----------|
| Count<ECFP_6:-<br>1910270391> | -9.19E-07 | Count<ECFP_6:-<br>677309799> | -4E-06 | Count<ECFP_6:89<br>8418220> | 1.47E-06 |
|-------------------------------|-----------|------------------------------|--------|-----------------------------|----------|

Note: Kw [PLSTempModel] = 0.7097 + 1.017e-05 \* [ALogP] + 0.002307 \* [Molecular\_Weight] + 1.362e-05 \* [Num\_H\_Donors] + 3.06e-05 \* [Num\_H\_Acceptors] + 3.862e-05 \* [Num\_RotatableBonds] + 6.851e-06 \* [Num\_Rings] + 6.222e-06 \* [Num\_AromaticRings] + 1.656e-07 \* [Molecular\_FractionalPolarSurfaceArea] + 3.162e-07 \* [Count<ECFP\_6:817402818>] + 4.344e-06 \* [Count<ECFP\_6:-1046436026>] + 6.349e-06 \* [Count<ECFP\_6:-1059365320>] + 7.593e-06 \* [Count<ECFP\_6:-1074414165>] + 4.048e-06 \* [Count<ECFP\_6:-1897341097>] + 9.476e-007 \* [Count<ECFP\_6:642810091>] + 2.801e-06 \* [Count<ECFP\_6:-1085223908>] + 2.561e-06 \* [Count<ECFP\_6:-182236392>] - 9.191e-007 \* [Count<ECFP\_6:-1910270391>] + 1.112e-05 \* [Count<ECFP\_6:1100000244>] + 5.041e-06 \* [Count<ECFP\_6:226796801>] + 1.446e-06 \* [Count<ECFP\_6:220735655>] + 8.492e-06 \* [Count<ECFP\_6:-1236483485>] + 3.018e-06 \* [Count<ECFP\_6:-177077903>] + 7.686e-08 \* [Count<ECFP\_6:1335691903>] + 1.497e-07 \* [Count<ECFP\_6:1996767644>] + 4.345e-06 \* [Count<ECFP\_6:-786013480>] + 2.432e-06 \* [Count<ECFP\_6:1430169877>] + 3.484e-06 \* [Count<ECFP\_6:1997021792>] + 5.115e-06 \* [Count<ECFP\_6:2007300961>] - 7.087e-007 \* [Count<ECFP\_6:1559650422>] - 2.954e-006 \* [Count<ECFP\_6:734603939>] + 2.644e-006 \* [Count<ECFP\_6:863188371>] + 2.726e-006 \* [Count<ECFP\_6:859796174>] - 1.687e-06 \* [Count<ECFP\_6:655739385>] - 4.032e-006 \* [Count<ECFP\_6:-677309799>] - 5.776e-006 \* [Count<ECFP\_6:864518973>] + 1.735e-06 \* [Count<ECFP\_6:-1764455838>] + 1.32e-006 \* [Count<ECFP\_6:-175507738>] - 3.7e-007 \* [Count<ECFP\_6:-992506539>] - 4.352e-007 \* [Count<ECFP\_6:-167460056>] + 2.288e-06 \* [Count<ECFP\_6:2106656448>] + 8.083e-06 \* [Count<ECFP\_6:864909220>] + 1.007e-006 \* [Count<ECFP\_6:845108448>] - 1.769e-006 \* [Count<ECFP\_6:845108448>]

[Count<ECFP\_6:826638028>] - 9.03e-007 \* [Count<ECFP\_6:672362763>] - 3.051e-006 \*  
 [Count<ECFP\_6:1310520534>]3.868e006\*[Count<ECFP\_6:1250439909>]1.145e006\*[Count<ECFP\_6:834876373>]3.225e006\*[Count<ECFP  
 \_6:949601813>]1.279e006\*[Count<ECFP\_6:830332112>]1.511e007\*[Count<ECFP\_6:1433087471>]+1.474e06\*[Count<ECFP\_6:898418220>]  
 1.625e006\*[Count<ECFP\_6:6895587320>]+4.572e-07\* [Count<ECFP\_6:1072294614>]+3.494e-06\*[Count<ECFP\_6:1337040050>] - 4.637e-  
 007 \* [Count<ECFP\_6:-  
 176494269>]1.595e006\*[Count<ECFP\_6:1564392544>]8.504e007\*[Count<ECFP\_6:1854732111>]+4.536e07\*[Count<ECFP\_6:1841329970>]1  
 .568e006\*[Count<ECFP\_6:676555381>]+3.548e08\*[Count<ECFP\_6:677055651>] - 1.516e-006 \* [Count<ECFP\_6:-708878603>] + 9.115e-07  
 \* [Count<ECFP\_6:-1925046727>] + 1.223e-06 \*  
 [Count<ECFP\_6:797085356>]+3.393e06\*[Count<ECFP\_6:2024255407>]1.112e006\*[Count<ECFP\_6:683445015>]+3.639e07\*[Count<ECFP  
 \_6:670515721>]1.83e006\*[Count<ECFP\_6:1571214559>] °

Table S4 the coefficients and associated variables for the equation of Kw 3D QSAR.

| Variable    | Coefficient | Variable     | Coefficient | Variable    | Coefficient | Variable     | Coefficient | Variable     | Coefficient |
|-------------|-------------|--------------|-------------|-------------|-------------|--------------|-------------|--------------|-------------|
| VdW_7_6_1   | -0.00292    | VdW_4_11_4   | -0.0001     | VdW_7_3_10  | -0.0174     | VdW_12_8_1_3 | 0.00665     | VdW_15_8_6   | 0.006747    |
| Ele_7_6_1   | 0.003745    | VdW_5_12_8   | 0.029165    | VdW_11_14_6 | -0.01183    | VdW_11_13_12 | 0.00243     | VdW_8_16_7   | 0.006252    |
| VdW_13_9_5  | 0.02725     | VdW_8_13_5   | -0.01049    | VdW_9_1_6   | 0.01476     | VdW_12_15_5  | -0.01144    | Ele_6_8_8    | -0.03177    |
| VdW_5_8_3   | -0.0001     | Ele_10_7_9   | -0.01432    | VdW_13_6_8  | -0.01076    | VdW_5_8_6    | 0.007471    | VdW_13_5_9   | 0.030983    |
| VdW_7_3_6   | 0.005902    | VdW_10_9_10  | 0.007587    | VdW_4_7_11  | -0.01481    | VdW_11_11_13 | -0.00728    | VdW_9_12_9   | -0.04179    |
| VdW_13_10_5 | -0.0023     | VdW_15_1_3_9 | 0.010079    | VdW_7_7_12  | -0.03553    | VdW_7_4_5    | 0.007444    | VdW_12_4_1_0 | -0.00177    |
| VdW_10_2_4  | -0.00573    | VdW_14_1_1_5 | 0.021005    | Ele_7_9_9   | -0.04703    | VdW_7_10_1_0 | -0.00721    | VdW_7_6_4    | -0.00176    |
| Ele_11_10_8 | 0.004988    | VdW_4_7_     | -0.02952    | VdW_7_14_7  | 0.017917    | VdW_6_6_5    | 0.019012    | VdW_9_6_8    | 0.03313     |

|              |          |                  |          |              |          |              |          |              |          |
|--------------|----------|------------------|----------|--------------|----------|--------------|----------|--------------|----------|
| VdW_12_12_3  | -0.01816 | 10<br>VdW_8_12_1 | -0.00609 | VdW_11_12_3  | 0.01594  | VdW_5_5_8    | -0.0161  | Ele_12_9_9   | -0.00032 |
| VdW_6_4_2    | -0.00299 | VdW_12_1_4_6     | 0.026061 | Ele_11_11_9  | 0.005928 | VdW_6_10_2   | 0.009417 | VdW_4_11_1_1 | 0.029645 |
| VdW_12_6_5   | 0.012996 | VdW_12_5_6       | -0.00132 | VdW_11_8_8   | 0.030585 | VdW_13_13_5  | -0.0092  | VdW_6_6_12   | -0.01499 |
| VdW_12_6_1_1 | -0.02004 | Ele_12_10_7      | -0.01525 | VdW_7_3_9    | 0.024357 | VdW_14_8_1_1 | -0.03213 | VdW_6_9_8    | 0.045305 |
| VdW_8_14_6   | 0.012813 | VdW_10_1_2_7     | -0.01706 | VdW_11_9_1_0 | 0.013574 | VdW_5_13_4   | 0.003094 | VdW_11_3_8   | 0.04167  |
| VdW_13_6_4   | 0.007619 | VdW_5_14_6       | -0.00371 | VdW_8_10_1_0 | 0.006716 | VdW_7_6_3    | -0.00634 | VdW_13_7_1_1 | -0.04099 |
| VdW_11_6_3   | -0.0092  | VdW_12_5_4       | 0.00459  | VdW_6_14_6   | 0.003156 | VdW_8_9_12   | -0.02469 | VdW_7_7_6    | -0.00111 |
| VdW_7_14_6   | 0.000747 | Ele_11_10_10     | 0.019629 | VdW_5_5_5    | 0.002528 | VdW_3_9_3    | 0.007309 | VdW_13_6_1_1 | -0.00724 |

|             |          |              |          |             |          |             |          |             |          |
|-------------|----------|--------------|----------|-------------|----------|-------------|----------|-------------|----------|
| VdW_9_8_6   | 0.049605 | VdW_6_12_12  | 0.015197 | VdW_11_4_7  | -0.0034  | VdW_15_6_10 | -0.01396 | VdW_10_7_4  | -0.00403 |
| VdW_13_8_4  | -0.03692 | VdW_10_11_9  | 0.02129  | VdW_4_6_10  | 0.002835 | VdW_6_14_9  | -0.01697 | VdW_4_8_10  | 0.01552  |
| VdW_7_13_5  | -0.01342 | VdW_6_11_3   | -0.02577 | Ele_11_8_9  | 0.04453  | VdW_6_3_4   | -0.00147 | VdW_5_13_6  | -0.0228  |
| VdW_7_3_7   | -0.01242 | VdW_9_3_5    | -0.00123 | VdW_12_7_4  | 0.018575 | VdW_13_13_7 | -0.02839 | VdW_9_1_5   | -0.00773 |
| VdW_12_9_8  | -0.01146 | VdW_5_4_7    | 0.010771 | Ele_7_11_8  | 0.025833 | VdW_13_7_12 | -0.00976 | VdW_9_6_9   | -0.02202 |
| VdW_7_11_8  | 0.024087 | Ele_7_9_10   | -0.02319 | VdW_8_4_11  | -0.01427 | VdW_10_5_9  | 0.002659 | VdW_14_10_7 | 0.00849  |
| VdW_15_8_10 | -0.02629 | VdW_17_8_6   | 0.030793 | VdW_4_10_10 | 0.0066   | Ele_9_6_9   | -0.00111 | VdW_13_8_11 | -0.00091 |
| VdW_9_7_7   | -0.00496 | VdW_10_11_10 | -0.02254 | Ele_9_9_11  | -0.01542 | VdW_4_9_7   | -0.0042  | Ele_9_11_10 | 0.016261 |
| VdW_13_11_  | -0.01514 | VdW_9_12     | -0.01086 | VdW_11_8_1  | 0.006907 | VdW_7_8_13  | -0.01835 | VdW_7_12_6  | 0.010175 |

|               |          |             |          |              |          |              |          |              |          |
|---------------|----------|-------------|----------|--------------|----------|--------------|----------|--------------|----------|
| 4             |          | _8          |          | 4            |          |              |          |              |          |
| VdW_5_12_7    | 0.006245 | VdW_8_13_3  | 0.008443 | VdW_4_9_4    | -0.00593 | VdW_16_8_1_2 | -0.01466 | VdW_13_9_1_2 | 0.003526 |
| VdW_6_11_1_1  | -0.00874 | VdW_14_8_6  | 0.017961 | VdW_14_7_5   | -0.02227 | VdW_11_4_5   | 0.039834 | VdW_1_10_4   | -0.00617 |
| VdW_12_7_3    | 0.004419 | VdW_5_7_10  | 0.036003 | VdW_16_8_7   | -0.00306 | VdW_11_5_3   | -0.02206 | VdW_7_11_6   | 0.029504 |
| VdW_5_12_4    | -0.02211 | VdW_13_8_5  | 0.008026 | VdW_7_10_2   | -0.01481 | VdW_11_13_11 | -0.00339 | VdW_11_12_4  | -0.01349 |
| VdW_13_12_5   | -0.00287 | VdW_6_10_10 | 0.036177 | VdW_8_14_4   | 0.00245  | VdW_8_7_6    | 0.00857  | VdW_11_7_9   | -0.01147 |
| VdW_7_5_5     | 0.005961 | VdW_8_12_8  | -0.02343 | VdW_4_3_6    | -0.03    | Ele_12_9_8   | -0.00708 | VdW_11_11_6  | -0.02044 |
| VdW_16_8_5    | -0.0119  | VdW_9_5_11  | -0.02055 | VdW_12_6_1_0 | 0.004122 | VdW_11_8_3   | 0.013617 | Ele_8_9_10   | 0.01895  |
| Ele_10_10_1_0 | -0.02014 | VdW_5_13_7  | -0.02912 | VdW_14_9_5   | -0.00146 | VdW_13_4_1_3 | 0.013903 | VdW_11_8_1_0 | -0.02666 |

|             |          |              |          |             |          |             |          |              |          |
|-------------|----------|--------------|----------|-------------|----------|-------------|----------|--------------|----------|
| VdW_13_4_9  | -0.0263  | VdW_10_6_13  | -0.00256 | Ele_8_7_10  | 0.020906 | VdW_14_5_7  | -0.00571 | VdW_14_12_11 | -0.00637 |
| Ele_11_10_7 | 0.015642 | VdW_5_10_3   | -0.01896 | VdW_12_4_6  | 0.02353  | Ele_8_9_11  | -0.01304 | VdW_11_5_4   | 0.030379 |
| VdW_9_11_10 | 0.03521  | VdW_9_10_6   | -0.02026 | VdW_12_10_7 | 0.032267 | VdW_7_4_11  | -0.01305 | VdW_7_13_11  | 0.014685 |
| VdW_11_3_10 | -0.01378 | VdW_12_4_11  | -0.01913 | VdW_8_15_6  | 0.001974 | VdW_5_7_5   | 0.003339 | VdW_7_10_12  | 0.0056   |
| VdW_10_7_8  | -0.01526 | VdW_5_7_11   | 0.015883 | VdW_11_2_4  | -0.00538 | VdW_14_12_4 | 0.007549 | Ele_12_8_8   | -0.01776 |
| VdW_14_11_6 | -0.02575 | VdW_14_12_10 | -0.01709 | VdW_14_7_10 | -0.00173 | VdW_8_4_4   | 0.01302  | VdW_11_6_8   | -0.00417 |
| VdW_11_10_9 | -0.01392 | VdW_7_9_12   | 0.019386 | Ele_11_8_8  | 0.021918 | Ele_7_7_10  | -0.00263 | VdW_13_11_11 | 0.015569 |
| VdW_4_12_10 | 0.017219 | VdW_13_7_5   | 0.009749 | VdW_6_7_11  | -0.00277 | VdW_14_6_10 | -0.00168 | VdW_6_5_10   | 0.001658 |
| Ele_10_11_9 | -0.00355 | VdW_15_8     | -0.02639 | VdW_14_5_1  | -0.00461 | VdW_6_3_7   | -0.0018  | VdW_14_8_1   | 0.010637 |

|             |          |              |          |              |          |              |          |              |          |
|-------------|----------|--------------|----------|--------------|----------|--------------|----------|--------------|----------|
|             |          | _5           | 0        |              |          | 2            |          |              |          |
| VdW_5_13_9  | -0.01548 | VdW_14_1_0_6 | 0.037437 | VdW_7_9_10   | -0.01006 | VdW_5_11_1_2 | 0.015857 | VdW_6_8_4    | -0.00835 |
| VdW_7_7_14  | -0.00574 | VdW_10_1_2_8 | 0.001151 | VdW_7_9_3    | 0.013402 | VdW_11_4_1_1 | 0.016254 | VdW_7_12_5   | -0.00964 |
| VdW_7_14_5  | 0.010787 | VdW_14_5_9   | -0.00163 | Ele_11_9_7   | -0.02282 | VdW_13_13_6  | 0.00615  | VdW_13_15_8  | -0.02481 |
| VdW_8_5_3   | 0.011669 | VdW_14_8_5   | 0.001099 | VdW_16_6_7   | -0.01505 | Ele_7_7_9    | -0.02329 | Ele_9_7_10   | 0.032405 |
| VdW_13_4_7  | 0.023853 | VdW_6_5_4    | 0.016108 | VdW_11_10_2  | 0.000479 | VdW_14_9_8   | 0.010421 | VdW_7_13_1_2 | -0.00389 |
| VdW_4_6_7   | -0.0106  | VdW_14_1_4_9 | 0.007332 | VdW_15_8_1_1 | 0.002866 | VdW_11_7_4   | 0.015148 | VdW_10_7_3   | 0.022421 |
| Ele_11_7_8  | 0.006884 | VdW_12_1_0_8 | 0.001246 | VdW_14_13_6  | 0.007964 | VdW_11_10_13 | 0.006389 | VdW_7_11_9   | 0.006178 |
| VdW_11_11_8 | 0.005624 | VdW_11_1_0_8 | 0.015601 | VdW_3_9_6    | 0.008067 | VdW_8_13_1_2 | 0.009288 | Ele_10_6_9   | -0.01991 |

|             |          |                  |          |                 |          |            |          |                 |          |
|-------------|----------|------------------|----------|-----------------|----------|------------|----------|-----------------|----------|
| VdW_11_9_7  | -0.00178 | VdW_11_1<br>0_7  | -0.02342 | VdW_8_14_5      | -0.00334 | Ele_10_7_8 | -0.00273 | VdW_8_14_1<br>2 | 0.031145 |
| VdW_15_12_6 | 0.015609 | VdW_11_1<br>4_12 | 0.001477 | VdW_8_10_1<br>3 | 0.021065 | Ele_12_9_7 | -0.02904 | VdW_11_10_6     | -0.00774 |
| VdW_6_13_4  | -0.01975 | VdW_7_12<br>_11  | 0.017938 | VdW_5_4_9       | 0.028828 | VdW_8_4_10 | 0.031553 | VdW_6_3_8       | 0.017451 |
| VdW_12_13_5 | 0.022895 | VdW_4_7_8        | 0.026345 | VdW_8_3_7       | 0.012198 | VdW_14_9_7 | -0.04186 | VdW_13_13_10    | -0.01031 |
| VdW_15_11_8 | -0.00785 | VdW_8_7_12       | 0.029969 | VdW_10_9_6      | -0.00418 | VdW_7_5_9  | -0.0007  | VdW_12_5_5      | -0.00652 |
| VdW_11_8_7  | -0.01543 | VdW_10_8_6       | 0.008595 | VdW_14_12_7     | -0.0015  | VdW_6_13_7 | 0.030931 | VdW_13_7_6      | 0.009167 |
| VdW_9_8_13  | -0.0029  | VdW_12_8_4       | 0.023818 | VdW_7_4_2       | 0.020434 | VdW_7_15_9 | -0.00563 | Ele_8_12_7      | -0.00656 |
| VdW_12_8_3  | -0.00473 | VdW_4_7_6        | 0.008183 | VdW_8_11_1<br>0 | 0.020297 | VdW_14_5_6 | -0.02451 | VdW_8_13_4      | -0.00943 |
| VdW_15_6_9  | 0.014431 | VdW_8_14         | -0.00805 | VdW_10_7_7      | -0.03018 | VdW_7_15_5 | -0.02757 | Ele_10_9_10     | -0.00906 |

|              |          |               |          |              |          |              |          |              |          |
|--------------|----------|---------------|----------|--------------|----------|--------------|----------|--------------|----------|
| VdW_5_6_4    | 0.014512 | VdW_6_4_6     | -0.00282 | VdW_12_11_4  | -0.01241 | VdW_15_7_6   | -0.0181  | VdW_12_6_9   | -0.02647 |
| VdW_11_10_10 | 0.042408 | VdW_10_1_1_6  | 0.003023 | VdW_12_12_12 | 0.01077  | VdW_6_10_7   | -0.02404 | VdW_7_11_1_1 | -0.01557 |
| VdW_8_17_8   | -0.02836 | VdW_7_11_13   | 0.028045 | VdW_13_12_10 | -0.00315 | VdW_14_7_4   | 0.013611 | VdW_12_4_9   | -0.0125  |
| VdW_12_8_5   | -0.00453 | VdW_6_7_3     | -0.00221 | VdW_6_11_1_2 | 0.002962 | VdW_13_13_4  | -0.00374 | Ele_6_9_7    | -0.0063  |
| VdW_11_8_9   | 0.013554 | VdW_10_1_0_10 | 0.029022 | VdW_8_4_9    | -0.02232 | VdW_7_15_1_0 | -0.00036 | VdW_4_11_7   | 0.023312 |
| VdW_13_12_9  | 0.026107 | VdW_14_1_2_9  | 0.008371 | VdW_11_5_1_1 | -0.0266  | VdW_14_13_7  | -0.02222 | Ele_11_9_10  | -0.01068 |
| VdW_14_8_1_0 | 0.012573 | VdW_8_15_8    | -0.00593 | Ele_6_10_8   | -0.05094 | VdW_7_13_3   | -0.01131 | VdW_11_8_1_1 | -0.01218 |
| VdW_10_6_9   | 0.028284 | VdW_13_5_7    | 0.014549 | VdW_14_12_5  | 0.013564 | VdW_6_4_5    | 0.004917 | VdW_7_6_12   | 0.00739  |

|              |          |               |          |              |          |              |          |              |          |
|--------------|----------|---------------|----------|--------------|----------|--------------|----------|--------------|----------|
| VdW_8_8_10   | -0.03406 | VdW_6_10_4    | 0.053448 | VdW_5_6_10   | -0.01096 | VdW_6_12_4   | 0.01025  | Ele_9_10_6   | 0.008036 |
| VdW_9_9_10   | 0.014593 | VdW_4_6_5     | -0.00407 | VdW_10_13_3  | 0.017769 | VdW_6_12_1_1 | -0.01904 | VdW_13_14_10 | -0.01649 |
| VdW_12_14_10 | 0.019585 | VdW_13_9_11   | 0.0287   | VdW_13_11_5  | 0.003853 | VdW_8_16_6   | -0.00711 | VdW_5_11_1_0 | -0.01134 |
| VdW_8_9_10   | 0.029721 | VdW_7_5_4     | 0.009394 | VdW_8_8_12   | 0.017134 | VdW_11_7_3   | 0.010012 | VdW_8_6_10   | -0.01946 |
| VdW_15_9_6   | 0.001745 | VdW_6_13_5    | 0.003515 | VdW_5_10_4   | -0.02306 | VdW_7_13_4   | 0.015627 | VdW_7_5_3    | -0.00023 |
| VdW_14_8_4   | 0.010953 | VdW_12_1_2_11 | -0.00365 | VdW_11_14_5  | -0.02013 | VdW_11_13_3  | 0.01289  | VdW_8_5_12   | 0.008243 |
| VdW_11_14_4  | -0.00826 | VdW_6_15_5    | -0.00154 | VdW_4_13_6   | -0.01646 | VdW_9_14_5   | -0.0098  | VdW_15_8_9   | 0.010507 |
| VdW_3_8_6    | 0.020952 | VdW_5_12_10   | 0.009067 | VdW_11_12_13 | 0.013689 | VdW_6_8_13   | -0.0183  | VdW_12_6_1_3 | -0.00221 |
| VdW_12_6_4   | -0.02017 | VdW_13_7      | -0.00724 | VdW_15_7_1   | -0.01076 | VdW_3_12_7   | -0.00111 | VdW_2_8_4    | 0.01696  |

|             |          |             |          |              |          |             |          |             |          |
|-------------|----------|-------------|----------|--------------|----------|-------------|----------|-------------|----------|
|             |          | _4          | 0        |              |          |             |          |             |          |
| Ele_9_9_10  | 0.005525 | VdW_3_12_9  | -0.04076 | VdW_11_11_7  | -0.01571 | VdW_13_14_7 | 0.009422 | VdW_10_10_6 | -0.03847 |
| VdW_11_11_9 | -0.0098  | VdW_13_12_8 | 0.027261 | VdW_14_7_6   | 0.02927  | VdW_12_9_7  | 0.003818 | VdW_6_10_8  | 0.001798 |
| VdW_8_8_13  | 0.004248 | Ele_7_10_10 | 0.015065 | Ele_8_12_9   | 0.011952 | VdW_10_12_3 | -0.00721 | Ele_10_8_7  | 0.000924 |
| VdW_7_9_4   | 0.033852 | VdW_11_6_4  | 0.021651 | VdW_14_13_10 | -0.0126  | VdW_6_4_10  | 0.016328 | VdW_4_14_8  | 0.009942 |
| VdW_8_8_3   | 0.003081 | VdW_10_6_12 | -0.03243 | VdW_8_7_4    | -0.00458 | VdW_11_7_13 | 0.001058 | VdW_10_5_10 | 0.023667 |
| VdW_10_8_7  | -0.03914 | VdW_12_11_2 | -0.00862 | VdW_3_11_10  | -0.02212 | VdW_11_14_8 | -0.03425 | VdW_12_3_4  | -0.00258 |
| VdW_8_7_13  | -0.01059 | VdW_6_7_9   | -0.01009 | VdW_13_13_11 | 0.017507 | VdW_8_3_9   | 0.003407 | VdW_9_14_7  | 0.013115 |
| VdW_11_7_8  | 0.028331 | VdW_15_9_10 | -0.01103 | VdW_12_14_5  | -0.01348 | VdW_9_3_7   | 0.024065 | VdW_8_5_4   | -0.00528 |

|                 |          |               |          |                 |          |             |          |                 |          |
|-----------------|----------|---------------|----------|-----------------|----------|-------------|----------|-----------------|----------|
| VdW_11_8_1<br>3 | 0.015168 | VdW_4_8_4     | -0.00033 | VdW_12_8_1<br>2 | -0.00362 | VdW_12_13_3 | -0.00691 | VdW_11_15_6     | 0.004629 |
| VdW_4_12_5      | -0.01192 | VdW_4_12_7    | -0.00494 | VdW_3_8_10      | 0.006139 | VdW_12_4_4  | -0.00212 | VdW_10_8_1<br>1 | 0.016104 |
| VdW_12_9_4      | 0.008944 | VdW_6_8_8     | -0.00783 | VdW_12_12_10    | 0.012309 | VdW_3_12_8  | -0.02802 | VdW_4_6_4       | 0.001006 |
| VdW_6_6_10      | 0.012582 | VdW_12_9_13   | 0.00721  | VdW_6_6_11      | -0.00912 | VdW_10_5_3  | -0.00311 | VdW_9_3_8       | 0.011005 |
| VdW_7_6_11      | 0.002094 | VdW_12_1_3_10 | -0.00766 | VdW_11_12_12    | 0.00689  | VdW_9_12_7  | -0.02307 | Ele_12_10_9     | 0.027234 |
| VdW_8_15_7      | 0.033528 | VdW_8_13_6    | -0.01118 | VdW_11_13_5     | 0.007005 | VdW_10_5_4  | 0.002988 | VdW_8_4_7       | -0.00967 |
| VdW_11_9_9      | -0.01212 | VdW_4_8_5     | -0.00468 | VdW_13_6_5      | 0.0152   | VdW_14_6_5  | -0.00036 | VdW_7_15_6      | -0.00786 |
| VdW_6_14_1<br>0 | -0.02513 | VdW_5_6_3     | -0.00591 | Ele_8_8_10      | -0.02235 | VdW_6_9_9   | 0.023175 | VdW_7_13_6      | -0.03482 |
| VdW_10_7_9      | 7.42E-05 | VdW_9_4_4     | 0.009424 | VdW_8_10_5      | 0.017753 | VdW_14_8_7  | 0.012886 | VdW_8_5_5       | -0.00865 |

|             |          |                 |          |             |          |              |          |            |          |
|-------------|----------|-----------------|----------|-------------|----------|--------------|----------|------------|----------|
| VdW_7_11_7  | 0.022211 | 4<br>VdW_7_11_4 | -0.00849 | VdW_8_7_14  | 0.013837 | VdW_6_5_7    | 0.001305 | VdW_6_11_8 | 0.005554 |
| VdW_12_11_3 | 0.013611 | VdW_6_5_11      | 0.03833  | VdW_5_13_5  | 0.011596 | VdW_3_12_6   | -0.02598 | VdW_12_8_8 | 0.007093 |
| VdW_6_13_9  | 0.027463 | VdW_11_4_4      | -0.00592 | VdW_7_7_3   | 0.018188 | VdW_15_11_7  | 0.011788 | VdW_8_13_1 | 0.00134  |
| VdW_5_11_3  | 0.012509 | VdW_12_1_2_4    | -0.02673 | VdW_4_7_5   | 0.013492 | VdW_7_14_1   | 0.005602 | VdW_10_5_1 | -0.01622 |
| VdW_16_12_9 | -0.01769 | VdW_7_9_9       | 0.008387 | VdW_11_11_3 | -0.01252 | VdW_5_8_4    | -0.03958 |            |          |
| VdW_7_6_1   | -0.00292 | VdW_4_11_4      | -0.0001  | VdW_7_3_10  | -0.0174  | VdW_12_8_1   | -0.00665 | VdW_15_8_6 | 0.006747 |
| Ele_7_6_1   | 0.003745 | VdW_5_12_8      | 0.029165 | VdW_11_14_6 | -0.01183 | VdW_11_13_12 | 0.00243  | VdW_8_16_7 | 0.006252 |
| VdW_13_9_5  | 0.02725  | VdW_8_13_5      | -0.01049 | VdW_9_1_6   | 0.01476  | VdW_12_15_5  | -0.01144 | Ele_6_8_8  | -0.03177 |

|              |          |              |          |             |          |              |          |              |          |
|--------------|----------|--------------|----------|-------------|----------|--------------|----------|--------------|----------|
| VdW_5_8_3    | -0.0001  | Ele_10_7_9   | -0.01432 | VdW_13_6_8  | -0.01076 | VdW_5_8_6    | 0.007471 | VdW_13_5_9   | 0.030983 |
| VdW_7_3_6    | 0.005902 | VdW_10_9_10  | 0.007587 | VdW_4_7_11  | -0.01481 | VdW_11_11_13 | -0.00728 | VdW_9_12_9   | -0.04179 |
| VdW_13_10_5  | -0.0023  | VdW_15_1_3_9 | 0.010079 | VdW_7_7_12  | -0.03553 | VdW_7_4_5    | 0.007444 | VdW_12_4_1_0 | -0.00177 |
| VdW_10_2_4   | -0.00573 | VdW_14_1_1_5 | 0.021005 | Ele_7_9_9   | -0.04703 | VdW_7_10_1_0 | -0.00721 | VdW_7_6_4    | -0.00176 |
| Ele_11_10_8  | 0.004988 | VdW_4_7_10   | -0.02952 | VdW_7_14_7  | 0.017917 | VdW_6_6_5    | 0.019012 | VdW_9_6_8    | 0.03313  |
| VdW_12_12_3  | -0.01816 | VdW_8_12_1   | -0.00609 | VdW_11_12_3 | 0.01594  | VdW_5_5_8    | -0.0161  | Ele_12_9_9   | -0.00032 |
| VdW_6_4_2    | -0.00299 | VdW_12_1_4_6 | 0.026061 | Ele_11_11_9 | 0.005928 | VdW_6_10_2   | 0.009417 | VdW_4_11_1_1 | 0.029645 |
| VdW_12_6_5   | 0.012996 | VdW_12_5_6   | -0.00132 | VdW_11_8_8  | 0.030585 | VdW_13_13_5  | -0.0092  | VdW_6_6_12   | -0.01499 |
| VdW_12_6_1_1 | -0.02004 | Ele_12_10_7  | -0.01525 | VdW_7_3_9   | 0.024357 | VdW_14_8_1_1 | -0.03213 | VdW_6_9_8    | 0.045305 |

|            |          |                  |          |                 |          |                 |          |                 |          |
|------------|----------|------------------|----------|-----------------|----------|-----------------|----------|-----------------|----------|
| VdW_8_14_6 | 0.012813 | VdW_10_1<br>2_7  | -0.01706 | VdW_11_9_1<br>0 | 0.013574 | VdW_5_13_4      | 0.003094 | VdW_11_3_8      | 0.04167  |
| VdW_13_6_4 | 0.007619 | VdW_5_14<br>_6   | -0.00371 | VdW_8_10_1<br>0 | 0.006716 | VdW_7_6_3       | -0.00634 | VdW_13_7_1<br>1 | -0.04099 |
| VdW_11_6_3 | -0.0092  | VdW_12_5<br>_4   | 0.00459  | VdW_6_14_6      | 0.003156 | VdW_8_9_12      | -0.02469 | VdW_7_7_6       | -0.00111 |
| VdW_7_14_6 | 0.000747 | Ele_11_10_<br>10 | 0.019629 | VdW_5_5_5       | 0.002528 | VdW_3_9_3       | 0.007309 | VdW_13_6_1<br>1 | -0.00724 |
| VdW_9_8_6  | 0.049605 | VdW_6_12<br>_12  | 0.015197 | VdW_11_4_7      | -0.0034  | VdW_15_6_1<br>0 | -0.01396 | VdW_10_7_4      | -0.00403 |
| VdW_13_8_4 | -0.03692 | VdW_10_1<br>1_9  | 0.02129  | VdW_4_6_10      | 0.002835 | VdW_6_14_9      | -0.01697 | VdW_4_8_10      | 0.01552  |
| VdW_7_13_5 | -0.01342 | VdW_6_11<br>_3   | -0.02577 | Ele_11_8_9      | 0.04453  | VdW_6_3_4       | -0.00147 | VdW_5_13_6      | -0.0228  |
| VdW_7_3_7  | -0.01242 | VdW_9_3_<br>5    | -0.00123 | VdW_12_7_4      | 0.018575 | VdW_13_13_<br>7 | -0.02839 | VdW_9_1_5       | -0.00773 |
| VdW_12_9_8 | -0.01146 | VdW_5_4_<br>_4   | 0.010771 | Ele_7_11_8      | 0.025833 | VdW_13_7_1      | -0.00976 | VdW_9_6_9       | -0.02202 |

|             |          |              |          |             |          |              |          |             |          |
|-------------|----------|--------------|----------|-------------|----------|--------------|----------|-------------|----------|
|             |          | 7            |          |             |          | 2            |          |             |          |
| VdW_7_11_8  | 0.024087 | Ele_7_9_10   | -0.02319 | VdW_8_4_11  | -0.01427 | VdW_10_5_9   | 0.002659 | VdW_14_10_7 | 0.00849  |
| VdW_15_8_10 | -0.02629 | VdW_17_8_6   | 0.030793 | VdW_4_10_10 | 0.0066   | Ele_9_6_9    | -0.00111 | VdW_13_8_11 | -0.00091 |
| VdW_9_7_7   | -0.00496 | VdW_10_11_10 | -0.02254 | Ele_9_9_11  | -0.01542 | VdW_4_9_7    | -0.0042  | Ele_9_11_10 | 0.016261 |
| VdW_13_11_4 | -0.01514 | VdW_9_12_8   | -0.01086 | VdW_11_8_14 | 0.006907 | VdW_7_8_13   | -0.01835 | VdW_7_12_6  | 0.010175 |
| VdW_5_12_7  | 0.006245 | VdW_8_13_3   | 0.008443 | VdW_4_9_4   | -0.00593 | VdW_16_8_12  | -0.01466 | VdW_13_9_12 | 0.003526 |
| VdW_6_11_1  | -0.00874 | VdW_14_8_6   | 0.017961 | VdW_14_7_5  | -0.02227 | VdW_11_4_5   | 0.039834 | VdW_1_10_4  | -0.00617 |
| VdW_12_7_3  | 0.004419 | VdW_5_7_10   | 0.036003 | VdW_16_8_7  | -0.00306 | VdW_11_5_3   | -0.02206 | VdW_7_11_6  | 0.029504 |
| VdW_5_12_4  | -0.02211 | VdW_13_8_5   | 0.008026 | VdW_7_10_2  | -0.01481 | VdW_11_13_11 | -0.00339 | VdW_11_12_4 | -0.01349 |

|              |          |             |          |             |          |             |          |              |          |
|--------------|----------|-------------|----------|-------------|----------|-------------|----------|--------------|----------|
| VdW_13_12_5  | -0.00287 | VdW_6_10_10 | 0.036177 | VdW_8_14_4  | 0.00245  | VdW_8_7_6   | 0.00857  | VdW_11_7_9   | -0.01147 |
| VdW_7_5_5    | 0.005961 | VdW_8_12_8  | -0.02343 | VdW_4_3_6   | -0.03    | Ele_12_9_8  | -0.00708 | VdW_11_11_6  | -0.02044 |
| VdW_16_8_5   | -0.0119  | VdW_9_5_11  | -0.02055 | VdW_12_6_10 | 0.004122 | VdW_11_8_3  | 0.013617 | Ele_8_9_10   | 0.01895  |
| Ele_10_10_10 | -0.02014 | VdW_5_13_7  | -0.02912 | VdW_14_9_5  | -0.00146 | VdW_13_4_13 | 0.013903 | VdW_11_8_10  | -0.02666 |
| VdW_13_4_9   | -0.0263  | VdW_10_6_13 | -0.00256 | Ele_8_7_10  | 0.020906 | VdW_14_5_7  | -0.00571 | VdW_14_12_11 | -0.00637 |
| Ele_11_10_7  | 0.015642 | VdW_5_10_3  | -0.01896 | VdW_12_4_6  | 0.02353  | Ele_8_9_11  | -0.01304 | VdW_11_5_4   | 0.030379 |
| VdW_9_11_10  | 0.03521  | VdW_9_10_6  | -0.02026 | VdW_12_10_7 | 0.032267 | VdW_7_4_11  | -0.01305 | VdW_7_13_11  | 0.014685 |
| VdW_11_3_10  | -0.01378 | VdW_12_4_11 | -0.01913 | VdW_8_15_6  | 0.001974 | VdW_5_7_5   | 0.003339 | VdW_7_10_12  | 0.0056   |
| VdW_10_7_8   | -0.01526 | VdW_5_7_7   | 0.015883 | VdW_11_2_4  | -0.00538 | VdW_14_12_7 | 0.007549 | Ele_12_8_8   | -0.01776 |

|             |          |              |          |             |          |             |          |              |          |
|-------------|----------|--------------|----------|-------------|----------|-------------|----------|--------------|----------|
|             |          | 11           |          |             | 4        |             |          |              |          |
| VdW_14_11_6 | -0.02575 | VdW_14_12_10 | -0.01709 | VdW_14_7_10 | -0.00173 | VdW_8_4_4   | 0.01302  | VdW_11_6_8   | -0.00417 |
| VdW_11_10_9 | -0.01392 | VdW_7_9_12   | 0.019386 | Ele_11_8_8  | 0.021918 | Ele_7_7_10  | -0.00263 | VdW_13_11_11 | 0.015569 |
| VdW_4_12_10 | 0.017219 | VdW_13_7_5   | 0.009749 | VdW_6_7_11  | -0.00277 | VdW_14_6_10 | -0.00168 | VdW_6_5_10   | 0.001658 |
| Ele_10_11_9 | -0.00355 | VdW_15_8_5   | -0.02639 | VdW_14_5_10 | -0.00461 | VdW_6_3_7   | -0.0018  | VdW_14_8_12  | 0.010637 |
| VdW_5_13_9  | -0.01548 | VdW_14_10_6  | 0.037437 | VdW_7_9_10  | -0.01006 | VdW_5_11_12 | 0.015857 | VdW_6_8_4    | -0.00835 |
| VdW_7_7_14  | -0.00574 | VdW_10_12_8  | 0.001151 | VdW_7_9_3   | 0.013402 | VdW_11_4_11 | 0.016254 | VdW_7_12_5   | -0.00964 |
| VdW_7_14_5  | 0.010787 | VdW_14_5_9   | -0.00163 | Ele_11_9_7  | -0.02282 | VdW_13_13_6 | 0.00615  | VdW_13_15_8  | -0.02481 |
| VdW_8_5_3   | 0.011669 | VdW_14_8_5   | 0.001099 | VdW_16_6_7  | -0.01505 | Ele_7_7_9   | -0.02329 | Ele_9_7_10   | 0.032405 |

|             |          |               |          |              |          |              |          |              |          |
|-------------|----------|---------------|----------|--------------|----------|--------------|----------|--------------|----------|
| VdW_13_4_7  | 0.023853 | VdW_6_5_4     | 0.016108 | VdW_11_10_2  | 0.000479 | VdW_14_9_8   | 0.010421 | VdW_7_13_1_2 | -0.00389 |
| VdW_4_6_7   | -0.0106  | VdW_14_1_4_9  | 0.007332 | VdW_15_8_1_1 | 0.002866 | VdW_11_7_4   | 0.015148 | VdW_10_7_3   | 0.022421 |
| Ele_11_7_8  | 0.006884 | VdW_12_1_0_8  | 0.001246 | VdW_14_13_6  | 0.007964 | VdW_11_10_13 | 0.006389 | VdW_7_11_9   | 0.006178 |
| VdW_11_11_8 | 0.005624 | VdW_11_1_0_8  | 0.015601 | VdW_3_9_6    | 0.008067 | VdW_8_13_1_2 | 0.009288 | Ele_10_6_9   | -0.01991 |
| VdW_11_9_7  | -0.00178 | VdW_11_1_0_7  | -0.02342 | VdW_8_14_5   | -0.00334 | Ele_10_7_8   | -0.00273 | VdW_8_14_1_2 | 0.031145 |
| VdW_15_12_6 | 0.015609 | VdW_11_1_4_12 | 0.001477 | VdW_8_10_1_3 | 0.021065 | Ele_12_9_7   | -0.02904 | VdW_11_10_6  | -0.00774 |
| VdW_6_13_4  | -0.01975 | VdW_7_12_11   | 0.017938 | VdW_5_4_9    | 0.028828 | VdW_8_4_10   | 0.031553 | VdW_6_3_8    | 0.017451 |
| VdW_12_13_5 | 0.022895 | VdW_4_7_8     | 0.026345 | VdW_8_3_7    | 0.012198 | VdW_14_9_7   | -0.04186 | VdW_13_13_10 | -0.01031 |
| VdW_15_11_  | -0.00785 | VdW_8_7_      | 0.029969 | VdW_10_9_6   | -0.00418 | VdW_7_5_9    | -0.0007  | VdW_12_5_5   | -0.00652 |

|              |          |              |          |              |          |             |          |              |          |
|--------------|----------|--------------|----------|--------------|----------|-------------|----------|--------------|----------|
| 8            |          | 12           |          |              |          |             |          |              |          |
| VdW_11_8_7   | -0.01543 | VdW_10_8_6   | 0.008595 | VdW_14_12_7  | -0.0015  | VdW_6_13_7  | 0.030931 | VdW_13_7_6   | 0.009167 |
| VdW_9_8_13   | -0.0029  | VdW_12_8_4   | 0.023818 | VdW_7_4_2    | 0.020434 | VdW_7_15_9  | -0.00563 | Ele_8_12_7   | -0.00656 |
| VdW_12_8_3   | -0.00473 | VdW_4_7_6    | 0.008183 | VdW_8_11_10  | 0.020297 | VdW_14_5_6  | -0.02451 | VdW_8_13_4   | -0.00943 |
| VdW_15_6_9   | 0.014431 | VdW_8_14_7   | -0.00805 | VdW_10_7_7   | -0.03018 | VdW_7_15_5  | -0.02757 | Ele_10_9_10  | -0.00906 |
| VdW_5_6_4    | 0.014512 | VdW_6_4_6    | -0.00282 | VdW_12_11_4  | -0.01241 | VdW_15_7_6  | -0.0181  | VdW_12_6_9   | -0.02647 |
| VdW_11_10_10 | 0.042408 | VdW_10_1_1_6 | 0.003023 | VdW_12_12_12 | 0.01077  | VdW_6_10_7  | -0.02404 | VdW_7_11_1_1 | -0.01557 |
| VdW_8_17_8   | -0.02836 | VdW_7_11_13  | 0.028045 | VdW_13_12_10 | -0.00315 | VdW_14_7_4  | 0.013611 | VdW_12_4_9   | -0.0125  |
| VdW_12_8_5   | -0.00453 | VdW_6_7_3    | -0.00221 | VdW_6_11_1_2 | 0.002962 | VdW_13_13_4 | -0.00374 | Ele_6_9_7    | -0.0063  |

|              |          |                  |          |                 |          |                 |          |                 |          |
|--------------|----------|------------------|----------|-----------------|----------|-----------------|----------|-----------------|----------|
| VdW_11_8_9   | 0.013554 | VdW_10_1<br>0_10 | 0.029022 | VdW_8_4_9       | -0.02232 | VdW_7_15_1<br>0 | -0.00036 | VdW_4_11_7      | 0.023312 |
| VdW_13_12_9  | 0.026107 | VdW_14_1<br>2_9  | 0.008371 | VdW_11_5_1<br>1 | -0.0266  | VdW_14_13_7     | -0.02222 | Ele_11_9_10     | -0.01068 |
| VdW_14_8_10  | 0.012573 | VdW_8_15<br>_8   | -0.00593 | Ele_6_10_8      | -0.05094 | VdW_7_13_3      | -0.01131 | VdW_11_8_1<br>1 | -0.01218 |
| VdW_10_6_9   | 0.028284 | VdW_13_5<br>_7   | 0.014549 | VdW_14_12_5     | 0.013564 | VdW_6_4_5       | 0.004917 | VdW_7_6_12      | 0.00739  |
| VdW_8_8_10   | -0.03406 | VdW_6_10<br>_4   | 0.053448 | VdW_5_6_10      | -0.01096 | VdW_6_12_4      | 0.01025  | Ele_9_10_6      | 0.008036 |
| VdW_9_9_10   | 0.014593 | VdW_4_6_5        | -0.00407 | VdW_10_13_3     | 0.017769 | VdW_6_12_1<br>1 | -0.01904 | VdW_13_14_10    | -0.01649 |
| VdW_12_14_10 | 0.019585 | VdW_13_9<br>_11  | 0.0287   | VdW_13_11_5     | 0.003853 | VdW_8_16_6      | -0.00711 | VdW_5_11_1<br>0 | -0.01134 |
| VdW_8_9_10   | 0.029721 | VdW_7_5_4        | 0.009394 | VdW_8_8_12      | 0.017134 | VdW_11_7_3      | 0.010012 | VdW_8_6_10      | -0.01946 |
| VdW_15_9_6   | 0.001745 | VdW_6_13         | 0.003515 | VdW_5_10_4      | -0.02306 | VdW_7_13_4      | 0.015627 | VdW_7_5_3       | -0.00023 |

|             |          |              |          |              |          |             |          |             |          |
|-------------|----------|--------------|----------|--------------|----------|-------------|----------|-------------|----------|
| VdW_14_8_4  | 0.010953 | VdW_12_1_5   | -0.00365 | VdW_11_14_5  | -0.02013 | VdW_11_13_3 | 0.01289  | VdW_8_5_12  | 0.008243 |
| VdW_11_14_4 | -0.00826 | VdW_6_15_5   | -0.00154 | VdW_4_13_6   | -0.01646 | VdW_9_14_5  | -0.0098  | VdW_15_8_9  | 0.010507 |
| VdW_3_8_6   | 0.020952 | VdW_5_12_10  | 0.009067 | VdW_11_12_13 | 0.013689 | VdW_6_8_13  | -0.0183  | VdW_12_6_13 | -0.00221 |
| VdW_12_6_4  | -0.02017 | VdW_13_7_4   | -0.00724 | VdW_15_7_10  | -0.01076 | VdW_3_12_7  | -0.00111 | VdW_2_8_4   | 0.01696  |
| Ele_9_9_10  | 0.005525 | VdW_3_12_9   | -0.04076 | VdW_11_11_7  | -0.01571 | VdW_13_14_7 | 0.009422 | VdW_10_10_6 | -0.03847 |
| VdW_11_11_9 | -0.0098  | VdW_13_1_2_8 | 0.027261 | VdW_14_7_6   | 0.02927  | VdW_12_9_7  | 0.003818 | VdW_6_10_8  | 0.001798 |
| VdW_8_8_13  | 0.004248 | Ele_7_10_10  | 0.015065 | Ele_8_12_9   | 0.011952 | VdW_10_12_3 | -0.00721 | Ele_10_8_7  | 0.000924 |
| VdW_7_9_4   | 0.033852 | VdW_11_6_4   | 0.021651 | VdW_14_13_10 | -0.0126  | VdW_6_4_10  | 0.016328 | VdW_4_14_8  | 0.009942 |

|              |          |              |          |              |          |              |          |              |          |
|--------------|----------|--------------|----------|--------------|----------|--------------|----------|--------------|----------|
| VdW_8_8_3    | 0.003081 | VdW_10_6_12  | -0.03243 | VdW_8_7_4    | -0.00458 | VdW_11_7_1_3 | 0.001058 | VdW_10_5_1_0 | 0.023667 |
| VdW_10_8_7   | -0.03914 | VdW_12_1_1_2 | -0.00862 | VdW_3_11_1_0 | -0.02212 | VdW_11_14_8  | -0.03425 | VdW_12_3_4   | -0.00258 |
| VdW_8_7_13   | -0.01059 | VdW_6_7_9    | -0.01009 | VdW_13_13_11 | 0.017507 | VdW_8_3_9    | 0.003407 | VdW_9_14_7   | 0.013115 |
| VdW_11_7_8   | 0.028331 | VdW_15_9_10  | -0.01103 | VdW_12_14_5  | -0.01348 | VdW_9_3_7    | 0.024065 | VdW_8_5_4    | -0.00528 |
| VdW_11_8_1_3 | 0.015168 | VdW_4_8_4    | -0.00033 | VdW_12_8_1_2 | -0.00362 | VdW_12_13_3  | -0.00691 | VdW_11_15_6  | 0.004629 |
| VdW_4_12_5   | -0.01192 | VdW_4_12_7   | -0.00494 | VdW_3_8_10   | 0.006139 | VdW_12_4_4   | -0.00212 | VdW_10_8_1_1 | 0.016104 |
| VdW_12_9_4   | 0.008944 | VdW_6_8_8    | -0.00783 | VdW_12_12_10 | 0.012309 | VdW_3_12_8   | -0.02802 | VdW_4_6_4    | 0.001006 |
| VdW_6_6_10   | 0.012582 | VdW_12_9_13  | 0.00721  | VdW_6_6_11   | -0.00912 | VdW_10_5_3   | -0.00311 | VdW_9_3_8    | 0.011005 |
| VdW_7_6_11   | 0.002094 | VdW_12_1     | -0.00766 | VdW_11_12_   | 0.00689  | VdW_9_12_7   | -0.02307 | Ele_12_10_9  | 0.027234 |

|             |          |                    |          |                   |          |             |          |            |          |
|-------------|----------|--------------------|----------|-------------------|----------|-------------|----------|------------|----------|
| VdW_8_15_7  | 0.033528 | 3_10<br>VdW_8_13_6 | -0.01118 | 12<br>VdW_11_13_5 | 0.007005 | VdW_10_5_4  | 0.002988 | VdW_8_4_7  | -0.00967 |
| VdW_11_9_9  | -0.01212 | VdW_4_8_5          | -0.00468 | VdW_13_6_5        | 0.0152   | VdW_14_6_5  | -0.00036 | VdW_7_15_6 | -0.00786 |
| VdW_6_14_10 | -0.02513 | VdW_5_6_3          | -0.00591 | Ele_8_8_10        | -0.02235 | VdW_6_9_9   | 0.023175 | VdW_7_13_6 | -0.03482 |
| VdW_10_7_9  | 7.42E-05 | VdW_9_4_4          | 0.009424 | VdW_8_10_5        | 0.017753 | VdW_14_8_7  | 0.012886 | VdW_8_5_5  | -0.00865 |
| VdW_7_11_7  | 0.022211 | VdW_7_11_4         | -0.00849 | VdW_8_7_14        | 0.013837 | VdW_6_5_7   | 0.001305 | VdW_6_11_8 | 0.005554 |
| VdW_12_11_3 | 0.013611 | VdW_6_5_11         | 0.03833  | VdW_5_13_5        | 0.011596 | VdW_3_12_6  | -0.02598 | VdW_12_8_8 | 0.007093 |
| VdW_6_13_9  | 0.027463 | VdW_11_4_4         | -0.00592 | VdW_7_7_3         | 0.018188 | VdW_15_11_7 | 0.011788 | VdW_8_13_1 | 0.00134  |
| VdW_5_11_3  | 0.012509 | VdW_12_1_2_4       | -0.02673 | VdW_4_7_5         | 0.013492 | VdW_7_14_1  | 0.005602 | VdW_10_5_1 | -0.01622 |

|             |          |             |          |             |          |              |          |             |          |
|-------------|----------|-------------|----------|-------------|----------|--------------|----------|-------------|----------|
| VdW_16_12_9 | -0.01769 | VdW_7_9_9   | 0.008387 | VdW_11_11_3 | -0.01252 | VdW_5_8_4    | -0.03958 |             |          |
| VdW_7_6_1   | -0.00292 | VdW_4_11_4  | -0.0001  | VdW_7_3_10  | -0.0174  | VdW_12_8_13  | -0.00665 | VdW_15_8_6  | 0.006747 |
| Ele_7_6_1   | 0.003745 | VdW_5_12_8  | 0.029165 | VdW_11_14_6 | -0.01183 | VdW_11_13_12 | 0.00243  | VdW_8_16_7  | 0.006252 |
| VdW_13_9_5  | 0.02725  | VdW_8_13_5  | -0.01049 | VdW_9_1_6   | 0.01476  | VdW_12_15_5  | -0.01144 | Ele_6_8_8   | -0.03177 |
| VdW_5_8_3   | -0.0001  | Ele_10_7_9  | -0.01432 | VdW_13_6_8  | -0.01076 | VdW_5_8_6    | 0.007471 | VdW_13_5_9  | 0.030983 |
| VdW_7_3_6   | 0.005902 | VdW_10_9_10 | 0.007587 | VdW_4_7_11  | -0.01481 | VdW_11_11_13 | -0.00728 | VdW_9_12_9  | -0.04179 |
| VdW_13_10_5 | -0.0023  | VdW_15_13_9 | 0.010079 | VdW_7_7_12  | -0.03553 | VdW_7_4_5    | 0.007444 | VdW_12_4_10 | -0.00177 |
| VdW_10_2_4  | -0.00573 | VdW_14_11_5 | 0.021005 | Ele_7_9_9   | -0.04703 | VdW_7_10_10  | -0.00721 | VdW_7_6_4   | -0.00176 |
| Ele_11_10_8 | 0.004988 | VdW_4_7_10  | -0.02952 | VdW_7_14_7  | 0.017917 | VdW_6_6_5    | 0.019012 | VdW_9_6_8   | 0.03313  |

|              |          |              |          |              |          |              |          |              |          |
|--------------|----------|--------------|----------|--------------|----------|--------------|----------|--------------|----------|
| VdW_12_12_3  | -0.01816 | VdW_8_12_1   | -0.00609 | VdW_11_12_3  | 0.01594  | VdW_5_5_8    | -0.0161  | Ele_12_9_9   | -0.00032 |
| VdW_6_4_2    | -0.00299 | VdW_12_1_4_6 | 0.026061 | Ele_11_11_9  | 0.005928 | VdW_6_10_2   | 0.009417 | VdW_4_11_1_1 | 0.029645 |
| VdW_12_6_5   | 0.012996 | VdW_12_5_6   | -0.00132 | VdW_11_8_8   | 0.030585 | VdW_13_13_5  | -0.0092  | VdW_6_6_12   | -0.01499 |
| VdW_12_6_1_1 | -0.02004 | Ele_12_10_7  | -0.01525 | VdW_7_3_9    | 0.024357 | VdW_14_8_1_1 | -0.03213 | VdW_6_9_8    | 0.045305 |
| VdW_8_14_6   | 0.012813 | VdW_10_1_2_7 | -0.01706 | VdW_11_9_1_0 | 0.013574 | VdW_5_13_4   | 0.003094 | VdW_11_3_8   | 0.04167  |
| VdW_13_6_4   | 0.007619 | VdW_5_14_6   | -0.00371 | VdW_8_10_1_0 | 0.006716 | VdW_7_6_3    | -0.00634 | VdW_13_7_1_1 | -0.04099 |
| VdW_11_6_3   | -0.0092  | VdW_12_5_4   | 0.00459  | VdW_6_14_6   | 0.003156 | VdW_8_9_12   | -0.02469 | VdW_7_7_6    | -0.00111 |
| VdW_7_14_6   | 0.000747 | Ele_11_10_10 | 0.019629 | VdW_5_5_5    | 0.002528 | VdW_3_9_3    | 0.007309 | VdW_13_6_1_1 | -0.00724 |
| VdW_9_8_6    | 0.049605 | VdW_6_12     | 0.015197 | VdW_11_4_7   | -0.0034  | VdW_15_6_1   | -0.01396 | VdW_10_7_4   | -0.00403 |

|              |          |               |          |              |          |              |          |              |          |
|--------------|----------|---------------|----------|--------------|----------|--------------|----------|--------------|----------|
|              |          | _12           |          |              | 0        |              |          |              |          |
| VdW_13_8_4   | -0.03692 | VdW_10_1_9    | 0.02129  | VdW_4_6_10   | 0.002835 | VdW_6_14_9   | -0.01697 | VdW_4_8_10   | 0.01552  |
| VdW_7_13_5   | -0.01342 | VdW_6_11_3    | -0.02577 | Ele_11_8_9   | 0.04453  | VdW_6_3_4    | -0.00147 | VdW_5_13_6   | -0.0228  |
| VdW_7_3_7    | -0.01242 | VdW_9_3_5     | -0.00123 | VdW_12_7_4   | 0.018575 | VdW_13_13_7  | -0.02839 | VdW_9_1_5    | -0.00773 |
| VdW_12_9_8   | -0.01146 | VdW_5_4_7     | 0.010771 | Ele_7_11_8   | 0.025833 | VdW_13_7_1_2 | -0.00976 | VdW_9_6_9    | -0.02202 |
| VdW_7_11_8   | 0.024087 | Ele_7_9_10    | -0.02319 | VdW_8_4_11   | -0.01427 | VdW_10_5_9   | 0.002659 | VdW_14_10_7  | 0.00849  |
| VdW_15_8_1_0 | -0.02629 | VdW_17_8_6    | 0.030793 | VdW_4_10_1_0 | 0.0066   | Ele_9_6_9    | -0.00111 | VdW_13_8_1_1 | -0.00091 |
| VdW_9_7_7    | -0.00496 | VdW_10_1_1_10 | -0.02254 | Ele_9_9_11   | -0.01542 | VdW_4_9_7    | -0.0042  | Ele_9_11_10  | 0.016261 |
| VdW_13_11_4  | -0.01514 | VdW_9_12_8    | -0.01086 | VdW_11_8_1_4 | 0.006907 | VdW_7_8_13   | -0.01835 | VdW_7_12_6   | 0.010175 |

|               |          |             |          |              |          |              |          |              |          |
|---------------|----------|-------------|----------|--------------|----------|--------------|----------|--------------|----------|
| VdW_5_12_7    | 0.006245 | VdW_8_13_3  | 0.008443 | VdW_4_9_4    | -0.00593 | VdW_16_8_1_2 | -0.01466 | VdW_13_9_1_2 | 0.003526 |
| VdW_6_11_1_1  | -0.00874 | VdW_14_8_6  | 0.017961 | VdW_14_7_5   | -0.02227 | VdW_11_4_5   | 0.039834 | VdW_1_10_4   | -0.00617 |
| VdW_12_7_3    | 0.004419 | VdW_5_7_10  | 0.036003 | VdW_16_8_7   | -0.00306 | VdW_11_5_3   | -0.02206 | VdW_7_11_6   | 0.029504 |
| VdW_5_12_4    | -0.02211 | VdW_13_8_5  | 0.008026 | VdW_7_10_2   | -0.01481 | VdW_11_13_11 | -0.00339 | VdW_11_12_4  | -0.01349 |
| VdW_13_12_5   | -0.00287 | VdW_6_10_10 | 0.036177 | VdW_8_14_4   | 0.00245  | VdW_8_7_6    | 0.00857  | VdW_11_7_9   | -0.01147 |
| VdW_7_5_5     | 0.005961 | VdW_8_12_8  | -0.02343 | VdW_4_3_6    | -0.03    | Ele_12_9_8   | -0.00708 | VdW_11_11_6  | -0.02044 |
| VdW_16_8_5    | -0.0119  | VdW_9_5_11  | -0.02055 | VdW_12_6_1_0 | 0.004122 | VdW_11_8_3   | 0.013617 | Ele_8_9_10   | 0.01895  |
| Ele_10_10_1_0 | -0.02014 | VdW_5_13_7  | -0.02912 | VdW_14_9_5   | -0.00146 | VdW_13_4_1_3 | 0.013903 | VdW_11_8_1_0 | -0.02666 |
| VdW_13_4_9    | -0.0263  | VdW_10_6    | -0.00256 | Ele_8_7_10   | 0.020906 | VdW_14_5_7   | -0.00571 | VdW_14_12_   | -0.00637 |

|             |          |              |          |             |          |             |          |              |          |
|-------------|----------|--------------|----------|-------------|----------|-------------|----------|--------------|----------|
|             |          | _13          |          |             |          |             |          | 11           |          |
| Ele_11_10_7 | 0.015642 | VdW_5_10_3   | -0.01896 | VdW_12_4_6  | 0.02353  | Ele_8_9_11  | -0.01304 | VdW_11_5_4   | 0.030379 |
| VdW_9_11_10 | 0.03521  | VdW_9_10_6   | -0.02026 | VdW_12_10_7 | 0.032267 | VdW_7_4_11  | -0.01305 | VdW_7_13_11  | 0.014685 |
| VdW_11_3_10 | -0.01378 | VdW_12_4_11  | -0.01913 | VdW_8_15_6  | 0.001974 | VdW_5_7_5   | 0.003339 | VdW_7_10_12  | 0.0056   |
| VdW_10_7_8  | -0.01526 | VdW_5_7_11   | 0.015883 | VdW_11_2_4  | -0.00538 | VdW_14_12_4 | 0.007549 | Ele_12_8_8   | -0.01776 |
| VdW_14_11_6 | -0.02575 | VdW_14_12_10 | -0.01709 | VdW_14_7_10 | -0.00173 | VdW_8_4_4   | 0.01302  | VdW_11_6_8   | -0.00417 |
| VdW_11_10_9 | -0.01392 | VdW_7_9_12   | 0.019386 | Ele_11_8_8  | 0.021918 | Ele_7_7_10  | -0.00263 | VdW_13_11_11 | 0.015569 |
| VdW_4_12_10 | 0.017219 | VdW_13_7_5   | 0.009749 | VdW_6_7_11  | -0.00277 | VdW_14_6_10 | -0.00168 | VdW_6_5_10   | 0.001658 |
| Ele_10_11_9 | -0.00355 | VdW_15_8_5   | -0.02639 | VdW_14_5_10 | -0.00461 | VdW_6_3_7   | -0.0018  | VdW_14_8_12  | 0.010637 |

|                 |          |                 |          |                 |          |                  |          |                 |          |
|-----------------|----------|-----------------|----------|-----------------|----------|------------------|----------|-----------------|----------|
| VdW_5_13_9      | -0.01548 | VdW_14_1<br>0_6 | 0.037437 | VdW_7_9_10      | -0.01006 | VdW_5_11_1<br>2  | 0.015857 | VdW_6_8_4       | -0.00835 |
| VdW_7_7_14      | -0.00574 | VdW_10_1<br>2_8 | 0.001151 | VdW_7_9_3       | 0.013402 | VdW_11_4_1<br>1  | 0.016254 | VdW_7_12_5      | -0.00964 |
| VdW_7_14_5      | 0.010787 | VdW_14_5<br>_9  | -0.00163 | Ele_11_9_7      | -0.02282 | VdW_13_13_<br>6  | 0.00615  | VdW_13_15_<br>8 | -0.02481 |
| VdW_8_5_3       | 0.011669 | VdW_14_8<br>_5  | 0.001099 | VdW_16_6_7      | -0.01505 | Ele_7_7_9        | -0.02329 | Ele_9_7_10      | 0.032405 |
| VdW_13_4_7      | 0.023853 | VdW_6_5_<br>4   | 0.016108 | VdW_11_10_<br>2 | 0.000479 | VdW_14_9_8       | 0.010421 | VdW_7_13_1<br>2 | -0.00389 |
| VdW_4_6_7       | -0.0106  | VdW_14_1<br>4_9 | 0.007332 | VdW_15_8_1<br>1 | 0.002866 | VdW_11_7_4       | 0.015148 | VdW_10_7_3      | 0.022421 |
| Ele_11_7_8      | 0.006884 | VdW_12_1<br>0_8 | 0.001246 | VdW_14_13_<br>6 | 0.007964 | VdW_11_10_<br>13 | 0.006389 | VdW_7_11_9      | 0.006178 |
| VdW_11_11_<br>8 | 0.005624 | VdW_11_1<br>0_8 | 0.015601 | VdW_3_9_6       | 0.008067 | VdW_8_13_1<br>2  | 0.009288 | Ele_10_6_9      | -0.01991 |
| VdW_11_9_7      | -0.00178 | VdW_11_1        | -0.02342 | VdW_8_14_5      | -0.00334 | Ele_10_7_8       | -0.00273 | VdW_8_14_1      | 0.031145 |

|             |          |                         |          |                 |          |            |          |                  |          |
|-------------|----------|-------------------------|----------|-----------------|----------|------------|----------|------------------|----------|
| VdW_15_12_6 | 0.015609 | 0_7<br>VdW_11_1<br>4_12 | 0.001477 | VdW_8_10_1<br>3 | 0.021065 | Ele_12_9_7 | -0.02904 | 2<br>VdW_11_10_6 | -0.00774 |
| VdW_6_13_4  | -0.01975 | VdW_7_12_11             | 0.017938 | VdW_5_4_9       | 0.028828 | VdW_8_4_10 | 0.031553 | VdW_6_3_8        | 0.017451 |
| VdW_12_13_5 | 0.022895 | VdW_4_7_8               | 0.026345 | VdW_8_3_7       | 0.012198 | VdW_14_9_7 | -0.04186 | VdW_13_13_10     | -0.01031 |
| VdW_15_11_8 | -0.00785 | VdW_8_7_12              | 0.029969 | VdW_10_9_6      | -0.00418 | VdW_7_5_9  | -0.0007  | VdW_12_5_5       | -0.00652 |
| VdW_11_8_7  | -0.01543 | VdW_10_8_6              | 0.008595 | VdW_14_12_7     | -0.0015  | VdW_6_13_7 | 0.030931 | VdW_13_7_6       | 0.009167 |
| VdW_9_8_13  | -0.0029  | VdW_12_8_4              | 0.023818 | VdW_7_4_2       | 0.020434 | VdW_7_15_9 | -0.00563 | Ele_8_12_7       | -0.00656 |
| VdW_12_8_3  | -0.00473 | VdW_4_7_6               | 0.008183 | VdW_8_11_10     | 0.020297 | VdW_14_5_6 | -0.02451 | VdW_8_13_4       | -0.00943 |
| VdW_15_6_9  | 0.014431 | VdW_8_14_7              | -0.00805 | VdW_10_7_7      | -0.03018 | VdW_7_15_5 | -0.02757 | Ele_10_9_10      | -0.00906 |

|              |          |               |          |              |          |              |          |              |          |
|--------------|----------|---------------|----------|--------------|----------|--------------|----------|--------------|----------|
| VdW_5_6_4    | 0.014512 | VdW_6_4_6     | -0.00282 | VdW_12_11_4  | -0.01241 | VdW_15_7_6   | -0.0181  | VdW_12_6_9   | -0.02647 |
| VdW_11_10_10 | 0.042408 | VdW_10_1_1_6  | 0.003023 | VdW_12_12_12 | 0.01077  | VdW_6_10_7   | -0.02404 | VdW_7_11_1_1 | -0.01557 |
| VdW_8_17_8   | -0.02836 | VdW_7_11_13   | 0.028045 | VdW_13_12_10 | -0.00315 | VdW_14_7_4   | 0.013611 | VdW_12_4_9   | -0.0125  |
| VdW_12_8_5   | -0.00453 | VdW_6_7_3     | -0.00221 | VdW_6_11_1_2 | 0.002962 | VdW_13_13_4  | -0.00374 | Ele_6_9_7    | -0.0063  |
| VdW_11_8_9   | 0.013554 | VdW_10_1_0_10 | 0.029022 | VdW_8_4_9    | -0.02232 | VdW_7_15_1_0 | -0.00036 | VdW_4_11_7   | 0.023312 |
| VdW_13_12_9  | 0.026107 | VdW_14_1_2_9  | 0.008371 | VdW_11_5_1_1 | -0.0266  | VdW_14_13_7  | -0.02222 | Ele_11_9_10  | -0.01068 |
| VdW_14_8_1_0 | 0.012573 | VdW_8_15_8    | -0.00593 | Ele_6_10_8   | -0.05094 | VdW_7_13_3   | -0.01131 | VdW_11_8_1_1 | -0.01218 |
| VdW_10_6_9   | 0.028284 | VdW_13_5_7    | 0.014549 | VdW_14_12_5  | 0.013564 | VdW_6_4_5    | 0.004917 | VdW_7_6_12   | 0.00739  |
| VdW_8_8_10   | -0.03406 | VdW_6_10      | 0.053448 | VdW_5_6_10   | -0.01096 | VdW_6_12_4   | 0.01025  | Ele_9_10_6   | 0.008036 |

|              |          |               |          |              |          |             |          |              |          |
|--------------|----------|---------------|----------|--------------|----------|-------------|----------|--------------|----------|
| VdW_9_9_10   | 0.014593 | VdW_4_6_5     | -0.00407 | VdW_10_13_3  | 0.017769 | VdW_6_12_1  | -0.01904 | VdW_13_14_10 | -0.01649 |
| VdW_12_14_10 | 0.019585 | VdW_13_9_11   | 0.0287   | VdW_13_11_5  | 0.003853 | VdW_8_16_6  | -0.00711 | VdW_5_11_10  | -0.01134 |
| VdW_8_9_10   | 0.029721 | VdW_7_5_4     | 0.009394 | VdW_8_8_12   | 0.017134 | VdW_11_7_3  | 0.010012 | VdW_8_6_10   | -0.01946 |
| VdW_15_9_6   | 0.001745 | VdW_6_13_5    | 0.003515 | VdW_5_10_4   | -0.02306 | VdW_7_13_4  | 0.015627 | VdW_7_5_3    | -0.00023 |
| VdW_14_8_4   | 0.010953 | VdW_12_1_2_11 | -0.00365 | VdW_11_14_5  | -0.02013 | VdW_11_13_3 | 0.01289  | VdW_8_5_12   | 0.008243 |
| VdW_11_14_4  | -0.00826 | VdW_6_15_5    | -0.00154 | VdW_4_13_6   | -0.01646 | VdW_9_14_5  | -0.0098  | VdW_15_8_9   | 0.010507 |
| VdW_3_8_6    | 0.020952 | VdW_5_12_10   | 0.009067 | VdW_11_12_13 | 0.013689 | VdW_6_8_13  | -0.0183  | VdW_12_6_13  | -0.00221 |
| VdW_12_6_4   | -0.02017 | VdW_13_7_4    | -0.00724 | VdW_15_7_10  | -0.01076 | VdW_3_12_7  | -0.00111 | VdW_2_8_4    | 0.01696  |

|             |          |              |          |              |          |              |          |              |          |
|-------------|----------|--------------|----------|--------------|----------|--------------|----------|--------------|----------|
| Ele_9_9_10  | 0.005525 | VdW_3_12_9   | -0.04076 | VdW_11_11_7  | -0.01571 | VdW_13_14_7  | 0.009422 | VdW_10_10_6  | -0.03847 |
| VdW_11_11_9 | -0.0098  | VdW_13_1_2_8 | 0.027261 | VdW_14_7_6   | 0.02927  | VdW_12_9_7   | 0.003818 | VdW_6_10_8   | 0.001798 |
| VdW_8_8_13  | 0.004248 | Ele_7_10_10  | 0.015065 | Ele_8_12_9   | 0.011952 | VdW_10_12_3  | -0.00721 | Ele_10_8_7   | 0.000924 |
| VdW_7_9_4   | 0.033852 | VdW_11_6_4   | 0.021651 | VdW_14_13_10 | -0.0126  | VdW_6_4_10   | 0.016328 | VdW_4_14_8   | 0.009942 |
| VdW_8_8_3   | 0.003081 | VdW_10_6_12  | -0.03243 | VdW_8_7_4    | -0.00458 | VdW_11_7_1_3 | 0.001058 | VdW_10_5_1_0 | 0.023667 |
| VdW_10_8_7  | -0.03914 | VdW_12_1_1_2 | -0.00862 | VdW_3_11_1_0 | -0.02212 | VdW_11_14_8  | -0.03425 | VdW_12_3_4   | -0.00258 |
| VdW_8_7_13  | -0.01059 | VdW_6_7_9    | -0.01009 | VdW_13_13_11 | 0.017507 | VdW_8_3_9    | 0.003407 | VdW_9_14_7   | 0.013115 |
| VdW_11_7_8  | 0.028331 | VdW_15_9_10  | -0.01103 | VdW_12_14_5  | -0.01348 | VdW_9_3_7    | 0.024065 | VdW_8_5_4    | -0.00528 |
| VdW_11_8_1  | 0.015168 | VdW_4_8_     | -0.00033 | VdW_12_8_1   | -0.00362 | VdW_12_13_   | -0.00691 | VdW_11_15_   | 0.004629 |

|             |          |              |          |              |          |            |          |             |          |
|-------------|----------|--------------|----------|--------------|----------|------------|----------|-------------|----------|
| 3           |          | 4            |          | 2            |          | 3          |          | 6           |          |
| VdW_4_12_5  | -0.01192 | VdW_4_12_7   | -0.00494 | VdW_3_8_10   | 0.006139 | VdW_12_4_4 | -0.00212 | VdW_10_8_11 | 0.016104 |
| VdW_12_9_4  | 0.008944 | VdW_6_8_8    | -0.00783 | VdW_12_12_10 | 0.012309 | VdW_3_12_8 | -0.02802 | VdW_4_6_4   | 0.001006 |
| VdW_6_6_10  | 0.012582 | VdW_12_9_13  | 0.00721  | VdW_6_6_11   | -0.00912 | VdW_10_5_3 | -0.00311 | VdW_9_3_8   | 0.011005 |
| VdW_7_6_11  | 0.002094 | VdW_12_13_10 | -0.00766 | VdW_11_12_12 | 0.00689  | VdW_9_12_7 | -0.02307 | Ele_12_10_9 | 0.027234 |
| VdW_8_15_7  | 0.033528 | VdW_8_13_6   | -0.01118 | VdW_11_13_5  | 0.007005 | VdW_10_5_4 | 0.002988 | VdW_8_4_7   | -0.00967 |
| VdW_11_9_9  | -0.01212 | VdW_4_8_5    | -0.00468 | VdW_13_6_5   | 0.0152   | VdW_14_6_5 | -0.00036 | VdW_7_15_6  | -0.00786 |
| VdW_6_14_10 | -0.02513 | VdW_5_6_3    | -0.00591 | Ele_8_8_10   | -0.02235 | VdW_6_9_9  | 0.023175 | VdW_7_13_6  | -0.03482 |
| VdW_10_7_9  | 7.42E-05 | VdW_9_4_4    | 0.009424 | VdW_8_10_5   | 0.017753 | VdW_14_8_7 | 0.012886 | VdW_8_5_5   | -0.00865 |

|             |          |              |          |             |          |              |          |            |          |
|-------------|----------|--------------|----------|-------------|----------|--------------|----------|------------|----------|
| VdW_7_11_7  | 0.022211 | VdW_7_11_4   | -0.00849 | VdW_8_7_14  | 0.013837 | VdW_6_5_7    | 0.001305 | VdW_6_11_8 | 0.005554 |
| VdW_12_11_3 | 0.013611 | VdW_6_5_11   | 0.03833  | VdW_5_13_5  | 0.011596 | VdW_3_12_6   | -0.02598 | VdW_12_8_8 | 0.007093 |
| VdW_6_13_9  | 0.027463 | VdW_11_4_4   | -0.00592 | VdW_7_7_3   | 0.018188 | VdW_15_11_7  | 0.011788 | VdW_8_13_1 | 0.00134  |
| VdW_5_11_3  | 0.012509 | VdW_12_1_2_4 | -0.02673 | VdW_4_7_5   | 0.013492 | VdW_7_14_1   | 0.005602 | VdW_10_5_1 | -0.01622 |
| VdW_16_12_9 | -0.01769 | VdW_7_9_9    | 0.008387 | VdW_11_11_3 | -0.01252 | VdW_5_8_4    | -0.03958 |            |          |
| VdW_7_6_1   | -0.00292 | VdW_4_11_4   | -0.0001  | VdW_7_3_10  | -0.0174  | VdW_12_8_1   | -0.00665 | VdW_15_8_6 | 0.006747 |
| Ele_7_6_1   | 0.003745 | VdW_5_12_8   | 0.029165 | VdW_11_14_6 | -0.01183 | VdW_11_13_12 | 0.00243  | VdW_8_16_7 | 0.006252 |
| VdW_13_9_5  | 0.02725  | VdW_8_13_5   | -0.01049 | VdW_9_1_6   | 0.01476  | VdW_12_15_5  | -0.01144 | Ele_6_8_8  | -0.03177 |
| VdW_5_8_3   | -0.0001  | Ele_10_7_9   | -0.01432 | VdW_13_6_8  | -0.01076 | VdW_5_8_6    | 0.007471 | VdW_13_5_9 | 0.030983 |

|             |          |             |          |             |          |              |          |             |          |
|-------------|----------|-------------|----------|-------------|----------|--------------|----------|-------------|----------|
| VdW_7_3_6   | 0.005902 | VdW_10_9_10 | 0.007587 | VdW_4_7_11  | -0.01481 | VdW_11_11_13 | -0.00728 | VdW_9_12_9  | -0.04179 |
| VdW_13_10_5 | -0.0023  | VdW_15_13_9 | 0.010079 | VdW_7_7_12  | -0.03553 | VdW_7_4_5    | 0.007444 | VdW_12_4_10 | -0.00177 |
| VdW_10_2_4  | -0.00573 | VdW_14_11_5 | 0.021005 | Ele_7_9_9   | -0.04703 | VdW_7_10_10  | -0.00721 | VdW_7_6_4   | -0.00176 |
| Ele_11_10_8 | 0.004988 | VdW_4_7_10  | -0.02952 | VdW_7_14_7  | 0.017917 | VdW_6_6_5    | 0.019012 | VdW_9_6_8   | 0.03313  |
| VdW_12_12_3 | -0.01816 | VdW_8_12_1  | -0.00609 | VdW_11_12_3 | 0.01594  | VdW_5_5_8    | -0.0161  | Ele_12_9_9  | -0.00032 |
| VdW_6_4_2   | -0.00299 | VdW_12_14_6 | 0.026061 | Ele_11_11_9 | 0.005928 | VdW_6_10_2   | 0.009417 | VdW_4_11_11 | 0.029645 |
| VdW_12_6_5  | 0.012996 | VdW_12_5_6  | -0.00132 | VdW_11_8_8  | 0.030585 | VdW_13_13_5  | -0.0092  | VdW_6_6_12  | -0.01499 |
| VdW_12_6_11 | -0.02004 | Ele_12_10_7 | -0.01525 | VdW_7_3_9   | 0.024357 | VdW_14_8_11  | -0.03213 | VdW_6_9_8   | 0.045305 |
| VdW_8_14_6  | 0.012813 | VdW_10_1    | -0.01706 | VdW_11_9_1  | 0.013574 | VdW_5_13_4   | 0.003094 | VdW_11_3_8  | 0.04167  |

|            |          |                   |          |                 |          |              |          |              |          |
|------------|----------|-------------------|----------|-----------------|----------|--------------|----------|--------------|----------|
| VdW_13_6_4 | 0.007619 | 2_7<br>VdW_5_14_6 | -0.00371 | 0<br>VdW_8_10_1 | 0.006716 | VdW_7_6_3    | -0.00634 | VdW_13_7_1_1 | -0.04099 |
| VdW_11_6_3 | -0.0092  | VdW_12_5_4        | 0.00459  | VdW_6_14_6      | 0.003156 | VdW_8_9_12   | -0.02469 | VdW_7_7_6    | -0.00111 |
| VdW_7_14_6 | 0.000747 | Ele_11_10_10      | 0.019629 | VdW_5_5_5       | 0.002528 | VdW_3_9_3    | 0.007309 | VdW_13_6_1_1 | -0.00724 |
| VdW_9_8_6  | 0.049605 | VdW_6_12_12       | 0.015197 | VdW_11_4_7      | -0.0034  | VdW_15_6_1_0 | -0.01396 | VdW_10_7_4   | -0.00403 |
| VdW_13_8_4 | -0.03692 | VdW_10_1_1_9      | 0.02129  | VdW_4_6_10      | 0.002835 | VdW_6_14_9   | -0.01697 | VdW_4_8_10   | 0.01552  |
| VdW_7_13_5 | -0.01342 | VdW_6_11_3        | -0.02577 | Ele_11_8_9      | 0.04453  | VdW_6_3_4    | -0.00147 | VdW_5_13_6   | -0.0228  |
| VdW_7_3_7  | -0.01242 | VdW_9_3_5         | -0.00123 | VdW_12_7_4      | 0.018575 | VdW_13_13_7  | -0.02839 | VdW_9_1_5    | -0.00773 |
| VdW_12_9_8 | -0.01146 | VdW_5_4_7         | 0.010771 | Ele_7_11_8      | 0.025833 | VdW_13_7_1_2 | -0.00976 | VdW_9_6_9    | -0.02202 |

|             |          |              |          |             |          |              |          |             |          |
|-------------|----------|--------------|----------|-------------|----------|--------------|----------|-------------|----------|
| VdW_7_11_8  | 0.024087 | Ele_7_9_10   | -0.02319 | VdW_8_4_11  | -0.01427 | VdW_10_5_9   | 0.002659 | VdW_14_10_7 | 0.00849  |
| VdW_15_8_10 | -0.02629 | VdW_17_8_6   | 0.030793 | VdW_4_10_10 | 0.0066   | Ele_9_6_9    | -0.00111 | VdW_13_8_11 | -0.00091 |
| VdW_9_7_7   | -0.00496 | VdW_10_11_10 | -0.02254 | Ele_9_9_11  | -0.01542 | VdW_4_9_7    | -0.0042  | Ele_9_11_10 | 0.016261 |
| VdW_13_11_4 | -0.01514 | VdW_9_12_8   | -0.01086 | VdW_11_8_14 | 0.006907 | VdW_7_8_13   | -0.01835 | VdW_7_12_6  | 0.010175 |
| VdW_5_12_7  | 0.006245 | VdW_8_13_3   | 0.008443 | VdW_4_9_4   | -0.00593 | VdW_16_8_12  | -0.01466 | VdW_13_9_12 | 0.003526 |
| VdW_6_11_11 | -0.00874 | VdW_14_8_6   | 0.017961 | VdW_14_7_5  | -0.02227 | VdW_11_4_5   | 0.039834 | VdW_1_10_4  | -0.00617 |
| VdW_12_7_3  | 0.004419 | VdW_5_7_10   | 0.036003 | VdW_16_8_7  | -0.00306 | VdW_11_5_3   | -0.02206 | VdW_7_11_6  | 0.029504 |
| VdW_5_12_4  | -0.02211 | VdW_13_8_5   | 0.008026 | VdW_7_10_2  | -0.01481 | VdW_11_13_11 | -0.00339 | VdW_11_12_4 | -0.01349 |

Table S5. the coefficients and associated variables for the equation of Kw-s 3D QSAR.

| Variable   | Coefficient | Variable    | Coefficient | Variable   | Coefficient | Variable    | Coefficient | Variable    | Coefficient |
|------------|-------------|-------------|-------------|------------|-------------|-------------|-------------|-------------|-------------|
|            | nt          |             | nt          |            | nt          |             | nt          |             | nt          |
| VdW_11_6_1 | -0.02319    | VdW_8_13_3  | 0.010508    | VdW_11_4_4 | -0.01407    | VdW_9_4_4   | 0.027477    | Ele_14_9_8  | 0.034244    |
| Ele_11_6_1 | 0.052014    | VdW_12_6_1  | -0.03382    | VdW_12_3_3 | 0.002549    | VdW_17_6_4  | 0.00158     | VdW_14_8_9  | -0.02597    |
| VdW_14_6_1 | 0.01338     | VdW_14_10_5 | 0.009333    | VdW_6_3_6  | 0.024729    | VdW_15_12_8 | -0.05784    | VdW_14_12_7 | 0.020695    |
| VdW_7_4_2  | -0.02712    | VdW_13_12_5 | -0.03858    | Ele_9_10_8 | -0.05128    | VdW_16_4_8  | -0.00418    | VdW_3_9_5   | -0.03601    |
| VdW_10_7_1 | 0.007108    | VdW_4_10_4  | -0.00534    | Ele_13_8_4 | 0.082442    | VdW_16_5_6  | -0.01626    | VdW_3_7_2   | 0.002863    |
| Ele_7_3_2  | 0.022777    | VdW_10_11_5 | 0.037783    | VdW_16_5_4 | -0.00585    | VdW_14_4_3  | -0.00803    | VdW_7_11_7  | -0.03367    |
| VdW_15_6_1 | 0.011249    | VdW_8_9_1   | -0.05559    | Ele_8_9_4  | -0.03796    | VdW_6_10_10 | -0.01538    | VdW_9_4_2   | 0.005881    |
| VdW_12_12  | 3.20E-05    | VdW_3_6_4   | -0.05033    | VdW_13_6_9 | -0.01585    | VdW_15_7_8  | -0.00374    | VdW_15_8_4  | 0.073266    |

|            |          |             |          |             |          |             |          |             |          |
|------------|----------|-------------|----------|-------------|----------|-------------|----------|-------------|----------|
| _2         |          |             |          |             |          |             |          |             |          |
| VdW_7_10_6 | 0.042993 | VdW_16_12_5 | -0.00205 | VdW_14_7_5  | -0.06145 | VdW_3_10_8  | 0.02699  | Ele_7_6_8   | -0.12182 |
| VdW_12_6_7 | -0.02615 | VdW_10_8_9  | -0.02489 | VdW_7_8_8   | 0.001854 | VdW_14_9_4  | 0.04614  | VdW_10_4_6  | -0.02498 |
| VdW_14_9_6 | 0.013761 | VdW_16_11_3 | -0.01566 | VdW_16_7_5  | -0.02397 | VdW_13_13_8 | -0.04201 | VdW_14_7_2  | 0.023394 |
| VdW_15_6_3 | -0.02464 | VdW_17_10_7 | 0.008169 | Ele_15_9_6  | 0.00614  | VdW_9_11_5  | -0.00624 | VdW_11_12_3 | 0.053148 |
| VdW_7_10_3 | 0.016903 | VdW_6_7_5   | 0.092958 | VdW_14_6_2  | -0.05318 | VdW_9_11_7  | -0.01994 | Ele_12_9_3  | 0.100681 |
| VdW_9_2_4  | -0.00758 | VdW_15_13_6 | 0.034699 | VdW_14_10_9 | 0.015685 | VdW_9_12_4  | 0.001659 | VdW_10_11_7 | 0.030572 |
| Ele_11_8_8 | -0.05137 | VdW_10_10_7 | -0.0507  | VdW_4_10_3  | -0.01534 | VdW_9_2_5   | -0.01193 | VdW_7_11_5  | -0.06783 |
| VdW_13_8_4 | 0.004493 | VdW_16_6_4  | -0.01628 | Ele_6_9_6   | -0.00384 | VdW_14_7_3  | 0.027957 | VdW_17_5_5  | 0.007971 |

|             |          |             |          |             |          |             |          |             |          |
|-------------|----------|-------------|----------|-------------|----------|-------------|----------|-------------|----------|
| Ele_10_8_8  | 0.017999 | VdW_13_3_4  | -0.03027 | VdW_8_11_9  | 0.032608 | VdW_12_4_5  | -0.00553 | VdW_8_13_6  | 0.005196 |
| VdW_13_9_8  | 0.029874 | VdW_10_6_7  | 0.01496  | VdW_8_2_5   | 0.00278  | Ele_11_7_9  | 0.009096 | VdW_8_5_6   | -0.03158 |
| VdW_17_7_4  | 0.013768 | VdW_15_5_8  | -0.00942 | VdW_4_4_5   | -0.0012  | Ele_12_11_7 | 0.104709 | Ele_6_7_5   | -0.03572 |
| VdW_11_8_3  | 0.007514 | VdW_14_7_6  | -0.02126 | Ele_13_8_8  | 0.091257 | VdW_7_12_3  | -0.00445 | VdW_15_11_5 | -0.02297 |
| VdW_13_10_5 | 0.02     | VdW_7_12_6  | 0.106322 | Ele_14_8_6  | -0.01146 | VdW_15_9_4  | 0.034808 | Ele_12_6_4  | -0.08063 |
| VdW_3_10_4  | -0.01048 | VdW_12_12_8 | -0.01674 | VdW_9_7_9   | 0.007465 | VdW_13_11_6 | 0.057986 | VdW_9_11_6  | 0.005013 |
| VdW_9_10_5  | 0.006096 | VdW_16_11_8 | -0.06442 | VdW_9_11_8  | 0.032007 | Ele_11_9_3  | 0.086556 | VdW_9_8_3   | 0.012933 |
| VdW_7_7_8   | 0.129601 | VdW_9_5_5   | -0.0205  | VdW_5_5_8   | 0.029384 | VdW_16_5_3  | 0.083978 | VdW_10_5_2  | 0.024442 |
| VdW_11_6_7  | -0.00869 | VdW_14_7_1  | 0.065545 | VdW_12_10_9 | -0.0068  | VdW_6_4_9   | -0.02638 | Ele_10_11_5 | -0.03535 |
| Ele_14_6_1  | 0.020237 | VdW_8_8_9   | 0.031712 | VdW_6_8_4   | -0.05125 | VdW_13_13_  | 0.002952 | VdW_11_4_8  | 0.023101 |

|             |          |             |          |            |          |             |          |             |          |
|-------------|----------|-------------|----------|------------|----------|-------------|----------|-------------|----------|
|             |          |             |          |            |          | 4           |          |             |          |
| VdW_10_10_6 | -0.08803 | VdW_7_3_4   | 0.062339 | VdW_4_6_4  | 0.008043 | VdW_7_5_7   | -0.05006 | Ele_6_6_3   | -0.067   |
| Ele_9_9_8   | -0.04923 | VdW_12_11_7 | -0.00958 | VdW_13_5_5 | -0.01582 | VdW_6_12_4  | -0.00198 | Ele_10_5_6  | 0.074456 |
| VdW_8_10_8  | 0.051595 | VdW_5_7_9   | -0.03017 | VdW_14_8_7 | -0.02435 | VdW_18_10_8 | -0.00991 | VdW_11_8_10 | -0.00024 |
| VdW_12_6_4  | 0.025405 | VdW_7_9_9   | -0.04607 | VdW_16_4_5 | 0.067935 | VdW_6_10_6  | -0.01786 | VdW_13_5_3  | -0.00584 |
| VdW_7_6_9   | -0.02842 | VdW_7_10_8  | 0.014576 | VdW_7_10_7 | 0.028004 | VdW_9_10_3  | -0.04895 | Ele_9_8_9   | 0.012306 |
| VdW_11_9_8  | -0.02153 | VdW_4_11_5  | -0.03034 | Ele_5_9_8  | -0.08473 | Ele_10_11_6 | -0.02385 | VdW_14_7_8  | -0.00106 |
| VdW_9_8_4   | 0.016249 | Ele_9_10_5  | 0.030349 | Ele_5_9_6  | -0.05554 | VdW_10_5_5  | -0.00566 | VdW_7_4_3   | 0.024525 |
| Ele_12_9_8  | 0.047995 | Ele_7_6_7   | -0.04472 | VdW_6_4_6  | -0.00288 | VdW_10_2_6  | 0.002439 | Ele_6_6_5   | -0.01776 |
| VdW_13_3_3  | -0.02506 | VdW_12_5_6  | 0.01286  | VdW_17_6_8 | -0.04162 | VdW_7_11_3  | 0.003935 | VdW_5_7_5   | 0.079474 |
| VdW_10_7_7  | 0.018873 | Ele_10_10_8 | -0.00774 | Ele_12_6_5 | -0.10601 | VdW_10_2_5  | 0.007845 | VdW_10_10_7 | -0.01923 |

|             |          |             |          |             |          |             |          |             |          |
|-------------|----------|-------------|----------|-------------|----------|-------------|----------|-------------|----------|
| 4           |          |             |          |             |          |             |          | 1           |          |
| VdW_12_6_5  | 0.03407  | VdW_7_9_4   | -0.04102 | VdW_6_7_8   | -0.02123 | VdW_7_12_7  | 0.090875 | VdW_13_12_4 | 0.005942 |
| VdW_9_9_8   | -0.05668 | VdW_15_6_9  | 0.030328 | VdW_7_7_4   | 0.019232 | VdW_4_5_5   | 0.011406 | VdW_4_8_2   | -0.01491 |
| VdW_9_10_6  | 0.004122 | Ele_9_6_5   | -0.03307 | VdW_6_8_10  | 0.011102 | VdW_14_9_8  | -0.02589 | Ele_8_7_3   | 0.042849 |
| VdW_5_11_4  | 0.025373 | Ele_14_10_5 | 0.020691 | VdW_6_3_8   | -0.01008 | VdW_5_5_2   | 0.025243 | VdW_7_13_4  | -0.04173 |
| VdW_3_7_4   | -0.00847 | VdW_14_5_10 | 0.042617 | VdW_14_7_9  | -0.02536 | VdW_10_11_6 | -0.05166 | VdW_11_12_5 | -0.06487 |
| VdW_7_6_7   | 0.074581 | VdW_6_5_9   | 0.008806 | Ele_13_6_8  | -0.0323  | VdW_6_10_5  | -0.05481 | VdW_11_13_5 | 0.019081 |
| Ele_10_10_7 | -0.10978 | VdW_14_5_3  | 0.025384 | Ele_10_11_7 | 0.117522 | Ele_14_7_9  | -0.07839 | VdW_5_5_7   | 0.023837 |
| Ele_9_10_7  | -0.01675 | VdW_5_4_5   | 0.038465 | Ele_8_10_4  | -0.058   | VdW_11_10_3 | -0.0375  | Ele_11_6_4  | 0.011839 |
| VdW_7_6_3   | -0.04721 | VdW_8_12_8  | 0.050856 | VdW_14_4_8  | -0.04816 | VdW_12_7_9  | 0.037715 | Ele_11_11_8 | 0.063261 |
| VdW_18_5_5  | -0.00989 | VdW_12_11_1 | 0.009752 | VdW_6_6_10  | 0.064904 | VdW_7_5_6   | 0.079008 | Ele_8_9_9   | 0.018228 |

|             |          |             |          |             |          |              |          |              |          |
|-------------|----------|-------------|----------|-------------|----------|--------------|----------|--------------|----------|
| 7           |          | 5           |          |             |          |              |          |              |          |
| VdW_12_9_8  | -0.00636 | VdW_8_4_2   | -0.01689 | VdW_6_9_4   | 0.017265 | VdW_12_5_10  | 0.029541 | VdW_10_6_11  | -0.07249 |
| VdW_13_4_7  | 0.079199 | VdW_8_9_4   | -0.03715 | Ele_11_10_8 | -0.00539 | VdW_12_11_10 | -0.00806 | Ele_12_6_8   | 0.03681  |
| VdW_10_12_8 | 0.005151 | VdW_12_6_8  | 0.035088 | VdW_4_12_5  | -0.0021  | VdW_5_10_8   | 0.036389 | VdW_10_14_5  | 0.009965 |
| VdW_9_10_7  | 0.092476 | VdW_14_9_5  | -0.00737 | VdW_13_4_6  | 0.003349 | Ele_13_7_4   | -0.03002 | VdW_5_6_4    | 0.017345 |
| VdW_14_10_6 | 0.030869 | VdW_3_7_5   | -0.01192 | Ele_13_9_4  | 0.121992 | VdW_9_7_3    | -0.05988 | VdW_14_9_10  | 0.01928  |
| VdW_7_10_9  | -0.00725 | VdW_7_3_3   | -0.03783 | VdW_3_9_4   | 0.038514 | Ele_7_7_4    | -0.02896 | Ele_15_9_2   | 0.016164 |
| VdW_9_9_4   | 0.059677 | VdW_14_11_8 | 0.021418 | VdW_4_7_4   | -0.02119 | VdW_15_3_5   | 0.088176 | VdW_13_10_10 | 0.008846 |
| Ele_9_10_6  | 0.006763 | Ele_13_9_8  | 0.012421 | Ele_9_5_6   | 0.114871 | Ele_8_7_4    | 0.039814 | VdW_6_3_5    | 0.011424 |
| VdW_11_10   | -0.03934 | VdW_17_10   | -0.06587 | VdW_13_5_6  | -0.09706 | Ele_9_5_5    | 0.021388 | VdW_16_8_5   | 0.005987 |

|             |          |             |          |              |          |             |          |             |          |
|-------------|----------|-------------|----------|--------------|----------|-------------|----------|-------------|----------|
| _4          |          | 4           |          |              |          |             |          |             |          |
| VdW_14_9_7  | 0.001654 | Ele_14_7_5  | -0.00984 | VdW_11_11_11 | 0.029345 | VdW_3_11_6  | -0.00574 | Ele_14_9_2  | 0.068282 |
| VdW_6_8_6   | -0.01532 | VdW_12_5_4  | 0.037213 | VdW_5_6_5    | -0.0652  | VdW_5_11_3  | -0.00241 | Ele_12_9_9  | 0.047341 |
| VdW_13_7_8  | -0.00704 | Ele_7_10_6  | 0.089658 | VdW_17_10_5  | 0.007778 | VdW_16_9_7  | -0.01154 | VdW_16_10_5 | 0.014479 |
| VdW_11_8_8  | -0.03026 | VdW_17_7_5  | 0.023258 | Ele_13_10_8  | 0.058635 | VdW_9_3_4   | 0.00886  | Ele_9_11_8  | -0.0066  |
| VdW_13_10_3 | -0.03733 | VdW_14_10_7 | 0.040667 | Ele_15_7_6   | -0.01663 | VdW_12_3_8  | -0.00454 | Ele_11_5_6  | 0.063883 |
| VdW_11_6_6  | -0.0122  | VdW_8_7_9   | 0.039632 | Ele_7_10_7   | 0.051033 | VdW_8_6_11  | 0.018431 | Ele_12_11_6 | 0.077448 |
| VdW_12_8_3  | -0.00975 | Ele_10_6_8  | 0.079589 | VdW_13_12_3  | -0.03089 | VdW_5_8_4   | 0.009359 | VdW_9_11_4  | -0.04587 |
| VdW_13_6_11 | 0.018804 | VdW_8_11_7  | -0.01846 | VdW_4_7_3    | 0.023936 | Ele_14_7_8  | -0.03882 | VdW_7_7_9   | 0.010905 |
| VdW_10_2_2  | 0.046579 | VdW_6_9_9   | -0.02932 | Ele_14_8_5   | -0.04485 | Ele_13_11_6 | -0.0428  | VdW_17_9_8  | -0.03097 |

|             |          |              |          |             |          |            |          |             |          |
|-------------|----------|--------------|----------|-------------|----------|------------|----------|-------------|----------|
| 4           |          |              |          |             |          |            |          |             |          |
| Ele_11_10_7 | 0.060948 | VdW_6_7_3    | 0.015831 | VdW_8_5_4   | 0.073955 | VdW_6_8_8  | -0.01454 | Ele_9_8_3   | 0.049676 |
| VdW_14_10_2 | -0.00233 | Ele_12_6_7   | 0.023449 | VdW_14_9_3  | 0.055369 | VdW_5_7_10 | 0.02466  | VdW_7_12_8  | 0.037457 |
| VdW_15_11_4 | 0.07462  | VdW_12_5_3   | -0.00623 | Ele_10_5_7  | 0.013464 | VdW_13_4_5 | 0.04581  | Ele_11_11_6 | -0.01677 |
| VdW_11_9_3  | -0.07003 | VdW_3_10_5   | -0.0055  | VdW_6_12_7  | 0.048559 | VdW_16_7_9 | 0.002516 | VdW_4_6_9   | 0.00081  |
| VdW_13_6_8  | 0.031545 | VdW_15_4_5   | -0.00191 | Ele_14_8_8  | 0.013752 | VdW_13_5_2 | -0.02061 | Ele_13_6_9  | -0.05149 |
| VdW_11_10_7 | -0.06499 | VdW_6_9_7    | -0.01726 | VdW_6_11_8  | 0.031975 | VdW_12_2_8 | -0.04316 | VdW_7_2_6   | 0.012691 |
| VdW_10_10_8 | 0.008292 | VdW_14_10_10 | -0.03309 | VdW_13_11_4 | -0.04319 | VdW_11_5_5 | -0.0038  | VdW_3_11_8  | 0.023577 |
| VdW_6_7_2   | 0.004133 | VdW_5_5_9    | 0.004741 | VdW_9_5_4   | 0.029479 | VdW_11_4_5 | 0.015687 | VdW_10_4_7  | 0.010386 |
| Ele_9_8_4   | 0.0458   | VdW_8_11_6   | -0.044   | Ele_14_6_6  | 0.036626 | VdW_5_11_7 | 0.064196 | VdW_9_2_8   | -0.01416 |
| VdW_7_12_2  | 0.007544 | Ele_13_7_8   | -0.03181 | VdW_7_13_5  | 0.005334 | VdW_12_6_9 | 0.013591 | VdW_6_9_5   | -0.02337 |

|             |          |             |          |             |          |              |          |             |          |
|-------------|----------|-------------|----------|-------------|----------|--------------|----------|-------------|----------|
| 5           |          |             |          |             |          |              |          |             |          |
| VdW_5_6_8   | -0.01878 | VdW_12_5_7  | -0.01385 | VdW_14_12_3 | 0.033793 | VdW_11_7_9   | 0.005302 | VdW_15_7_6  | -0.0098  |
| VdW_9_7_4   | 0.040788 | VdW_12_14_6 | -0.01179 | VdW_5_12_5  | -0.02606 | VdW_12_12_10 | 0.059875 | Ele_15_7_4  | 0.054503 |
| VdW_6_9_3   | -0.05908 | Ele_6_8_5   | -0.01469 | VdW_13_10_8 | 0.08015  | VdW_13_4_9   | -0.02064 | VdW_13_9_9  | -0.03444 |
| Ele_14_9_6  | 0.104807 | VdW_3_6_8   | -0.01055 | VdW_5_13_5  | 0.048774 | VdW_3_6_7    | 0.015522 | VdW_19_7_7  | 0.00375  |
| VdW_9_6_5   | -0.00393 | VdW_6_7_6   | 0.037342 | Ele_6_6_7   | -0.08246 | VdW_12_8_10  | 0.034708 | VdW_4_5_8   | 0.005412 |
| VdW_11_7_4  | 0.132634 | VdW_11_11_9 | 0.00352  | VdW_10_11_2 | 0.025489 | VdW_4_12_8   | 0.036089 | VdW_6_11_6  | -0.0056  |
| VdW_12_10_8 | 0.066226 | VdW_16_10_6 | -0.02282 | VdW_15_7_2  | -0.00158 | VdW_11_11_4  | 0.005698 | VdW_13_11_9 | -0.03038 |
| VdW_8_5_3   | -0.02    | Ele_11_9_9  | -0.06418 | Ele_5_11_5  | 0.043468 | VdW_10_5_6   | -0.0923  | VdW_9_11_11 | 0.014874 |
| Ele_13_6_7  | 0.045797 | VdW_5_10_3  | -0.02418 | VdW_8_12_4  | 0.036124 | VdW_3_4_4    | -0.01762 | VdW_11_6_8  | -0.02165 |

|             |          |             |          |             |          |             |          |             |          |
|-------------|----------|-------------|----------|-------------|----------|-------------|----------|-------------|----------|
| VdW_7_9_8   | -0.0152  | VdW_14_12_5 | 0.002301 | VdW_9_3_5   | -0.00129 | VdW_15_10_7 | -0.11552 | Ele_12_3_3  | -0.04344 |
| VdW_10_6_5  | -0.06838 | Ele_10_6_5  | -0.07892 | VdW_16_10_4 | -0.04916 | VdW_16_5_7  | -0.02339 | Ele_14_7_1  | 0.018854 |
| VdW_13_10_7 | -0.02262 | VdW_11_11_7 | 0.051144 | VdW_15_10_9 | 0.01658  | VdW_3_11_5  | 0.0348   | VdW_5_8_2   | 0.003664 |
| VdW_7_11_8  | 0.005973 | VdW_10_4_8  | 0.034292 | VdW_16_11_5 | -0.05706 | VdW_15_6_10 | -0.00604 | Ele_8_4_6   | 0.087807 |
| VdW_13_6_5  | -0.0114  | VdW_8_5_9   | 0.020413 | VdW_7_4_5   | -0.05428 | VdW_13_7_9  | 0.002785 | VdW_10_12_5 | -0.01821 |
| VdW_10_8_8  | -0.05384 | VdW_6_8_5   | -0.00088 | VdW_17_10_8 | -0.02321 | VdW_4_11_6  | 0.063907 | VdW_14_13_8 | 0.041046 |
| VdW_9_11_1  | 0.009326 | Ele_11_6_7  | -0.06202 | Ele_9_11_6  | -0.01421 | VdW_15_9_6  | -0.04169 | VdW_10_12_6 | -0.03321 |
| VdW_14_12_6 | -0.00625 | VdW_11_11_8 | 0.019522 | VdW_11_10_8 | -0.02347 | Ele_9_7_4   | 0.024844 | VdW_9_13_4  | -0.03828 |
| VdW_7_10_   | 0.03287  | Ele_14_9_5  | 0.103537 | VdW_7_5_10  | 0.050956 | VdW_12_7_3  | 0.027509 | VdW_15_5_2  | 0.023632 |

|             |          |              |          |             |          |             |          |             |          |
|-------------|----------|--------------|----------|-------------|----------|-------------|----------|-------------|----------|
| 2           |          |              |          |             |          |             |          |             |          |
| VdW_6_7_9   | -0.08224 | Ele_10_10_5  | -0.05469 | VdW_14_11_4 | -0.01502 | VdW_14_4_4  | 0.004686 | Ele_12_11_5 | 0.014649 |
| VdW_13_6_7  | -0.0218  | VdW_9_11_3   | 0.006155 | VdW_2_6_3   | 0.028047 | Ele_13_5_7  | -0.04282 | Ele_9_9_4   | -0.00054 |
| Ele_11_6_5  | 0.002139 | VdW_12_9_3   | -0.0985  | Ele_10_9_4  | -0.00731 | VdW_15_6_5  | 0.10252  | VdW_8_3_8   | 0.04341  |
| VdW_7_4_7   | -0.00068 | Ele_12_10_8  | -0.00514 | VdW_15_9_10 | -0.00318 | Ele_10_11_4 | 0.079802 | VdW_10_3_3  | -0.03248 |
| VdW_14_8_6  | 0.06827  | VdW_15_10_10 | -0.01052 | VdW_4_11_8  | -0.05057 | VdW_12_5_8  | -0.04597 | VdW_6_8_2   | -0.02215 |
| VdW_12_5_9  | 0.025903 | VdW_15_11_3  | 0.007213 | VdW_6_5_7   | -0.02833 | VdW_8_8_3   | -0.03665 | Ele_7_11_6  | 0.141463 |
| VdW_10_5_9  | 0.124453 | VdW_5_12_8   | -0.0532  | VdW_14_6_3  | 0.03808  | VdW_6_6_7   | 0.121993 | VdW_7_4_9   | 0.055978 |
| VdW_16_10_3 | 0.077293 | VdW_14_5_9   | -0.01439 | VdW_13_5_8  | 0.069762 | VdW_10_9_4  | -0.05585 | VdW_13_7_3  | -0.00633 |
| VdW_16_6_9  | 0.018924 | Ele_4_5_2    | -0.0343  | VdW_5_7_2   | -0.00643 | VdW_7_3_8   | 0.048355 | VdW_4_8_4   | -0.01598 |

|             |          |             |          |             |          |             |          |             |          |
|-------------|----------|-------------|----------|-------------|----------|-------------|----------|-------------|----------|
| 3           |          |             |          |             |          |             |          |             |          |
| VdW_7_6_8   | 0.00763  | VdW_12_9_9  | 0.056676 | Ele_14_8_7  | 0.063174 | VdW_6_13_6  | -0.07895 | Ele_10_12_5 | 0.024482 |
| VdW_4_11_3  | 0.020847 | VdW_11_5_9  | 0.036538 | VdW_11_5_7  | -0.00557 | VdW_15_9_9  | 0.009966 | VdW_13_6_3  | -0.02378 |
| VdW_10_6_6  | -0.01311 | VdW_12_11_6 | 0.054557 | Ele_9_9_9   | -0.00054 | VdW_6_6_5   | 0.076257 | Ele_15_6_6  | -0.01528 |
| VdW_8_7_4   | -0.02968 | VdW_14_6_8  | -0.00973 | Ele_7_8_8   | 0.005536 | VdW_6_10_9  | 0.015883 | Ele_15_6_5  | -0.06638 |
| VdW_13_9_4  | 0.013932 | Ele_10_9_8  | 0.066048 | VdW_4_12_6  | -0.04392 | VdW_15_10_5 | 0.03947  | VdW_4_5_2   | 0.0064   |
| VdW_10_9_8  | -0.07677 | VdW_13_10_9 | -0.01896 | VdW_10_2_8  | -0.06227 | VdW_6_8_9   | -0.01485 | VdW_12_14_4 | 0.00268  |
| VdW_6_12_6  | 0.044796 | VdW_3_13_6  | -0.00728 | VdW_12_3_6  | 0.025661 | VdW_14_11_9 | 0.024148 | VdW_13_9_2  | 0.012141 |
| VdW_11_7_10 | 0.012431 | VdW_9_5_7   | -0.02833 | VdW_15_10_3 | 0.007166 | VdW_2_11_5  | -0.00797 | Ele_11_10_9 | 0.001562 |
| VdW_14_6_5  | -0.03121 | VdW_9_3_9   | -0.10129 | VdW_9_12_3  | 0.014752 | VdW_15_8_5  | -0.01052 | Ele_14_8_4  | -0.01723 |

|             |          |             |          |             |          |             |          |             |          |
|-------------|----------|-------------|----------|-------------|----------|-------------|----------|-------------|----------|
| Ele_10_6_6  | -0.08079 | VdW_7_3_2   | -0.00114 | VdW_11_11_5 | -0.0208  | Ele_11_10_5 | 0.03552  | Ele_5_9_7   | -0.04348 |
| VdW_9_12_8  | -0.02033 | VdW_12_11_9 | -0.01708 | VdW_10_15_3 | 0.02098  | Ele_11_11_5 | -0.0002  | Ele_11_5_7  | 0.076419 |
| Ele_14_7_7  | -0.04741 | VdW_7_8_9   | 0.085704 | VdW_10_11_3 | 0.042177 | VdW_15_8_3  | -0.00739 | Ele_6_7_6   | -0.02594 |
| VdW_13_8_8  | 0.020145 | VdW_5_8_9   | -0.04004 | Ele_8_5_5   | -0.00677 | VdW_11_12_4 | -0.0164  | Ele_9_10_4  | -0.08544 |
| VdW_14_5_8  | -0.02013 | VdW_12_5_5  | -0.01347 | VdW_14_3_5  | -0.00508 | Ele_7_7_3   | 0.070504 | Ele_14_7_4  | 0.074127 |
| VdW_8_2_8   | -0.01221 | VdW_8_11_5  | -0.00978 | VdW_10_9_9  | -0.08838 | VdW_9_4_7   | -0.09581 | Ele_7_6_3   | -0.00112 |
| VdW_16_6_5  | 0.002957 | VdW_9_8_9   | 0.020925 | VdW_5_5_3   | -0.06823 | Ele_13_6_4  | -0.02058 | VdW_10_11_4 | -0.02327 |
| VdW_6_4_8   | -0.02259 | VdW_11_11_6 | -0.09669 | VdW_15_7_9  | 0.027974 | Ele_6_4_2   | 0.048962 | VdW_2_7_6   | -0.00334 |
| VdW_12_11_2 | 0.021601 | VdW_8_6_4   | 0.020366 | VdW_12_4_4  | -0.04203 | VdW_10_5_8  | 0.012572 | VdW_7_5_9   | -0.02593 |

|             |          |            |          |              |          |             |          |             |          |
|-------------|----------|------------|----------|--------------|----------|-------------|----------|-------------|----------|
| VdW_14_11_3 | 0.013253 | VdW_14_6_7 | -0.0125  | VdW_9_14_6   | -0.00316 | VdW_5_9_4   | -0.04356 | VdW_13_13_6 | -0.02473 |
| Ele_6_8_7   | 0.049656 | VdW_11_5_6 | 0.021752 | Ele_13_10_7  | -0.03644 | VdW_6_6_4   | -0.05309 | Ele_10_8_9  | -0.04586 |
| VdW_10_5_7  | -0.00773 | Ele_6_9_7  | 0.089309 | Ele_6_9_8    | -0.01086 | Ele_14_5_6  | -0.10626 | VdW_9_4_9   | 0.026017 |
| VdW_15_6_2  | -0.02601 | VdW_15_7_5 | 0.049821 | VdW_18_7_9   | -0.04496 | VdW_4_7_9   | 0.00158  | Ele_7_8_2   | -0.01991 |
| VdW_9_10_1  | -0.05508 | VdW_8_4_9  | -0.03121 | Ele_7_7_8    | -0.02957 | VdW_12_12_3 | 0.005334 | VdW_15_9_5  | 0.005068 |
| VdW_13_7_4  | -0.02469 | VdW_8_11_8 | 0.019842 | VdW_10_11_10 | 0.037475 | VdW_10_4_2  | -0.06626 | Ele_14_10_6 | 0.021585 |
| VdW_7_10_4  | -0.06986 | VdW_8_10_9 | 0.001088 | VdW_2_10_4   | 0.004738 | VdW_7_6_2   | 0.025392 | VdW_6_5_6   | 0.091778 |
| VdW_8_13_4  | -0.00397 | VdW_11_2_8 | 0.024532 | VdW_14_9_2   | 0.033147 | VdW_10_4_5  | 0.04206  | Ele_6_8_6   | -0.01436 |
| VdW_14_12_8 | 0.042893 | VdW_4_8_5  | 0.016556 | Ele_9_12_4   | 0.032774 | VdW_2_12_8  | -0.01612 | VdW_10_11_8 | 0.006872 |

|             |          |             |          |            |          |              |          |              |          |
|-------------|----------|-------------|----------|------------|----------|--------------|----------|--------------|----------|
| VdW_14_8_8  | 0.053025 | VdW_12_2_6  | 0.028345 | Ele_6_7_8  | 0.020976 | VdW_14_7_1_0 | 0.036983 | VdW_9_4_3    | 0.005868 |
| VdW_12_10_4 | -0.06996 | VdW_7_6_4   | -0.02899 | Ele_11_9_8 | 0.00492  | VdW_5_6_7    | -0.02305 | Ele_13_10_4  | 0.087866 |
| VdW_11_10_5 | -0.00731 | VdW_3_7_8   | 0.015067 | Ele_6_7_7  | -0.0098  | Ele_7_9_8    | -0.01388 | Ele_5_5_5    | 0.010148 |
| VdW_7_5_4   | -0.07226 | VdW_11_6_5  | 0.040172 | VdW_6_7_7  | 0.108085 | VdW_8_13_5   | 0.03023  | Ele_5_7_5    | -0.02681 |
| VdW_10_8_3  | -0.05024 | VdW_6_6_8   | 0.003477 | VdW_6_7_4  | 0.008239 | Ele_12_5_6   | 0.034197 | VdW_10_8_2   | -0.01024 |
| VdW_10_7_9  | 0.099814 | VdW_17_11_6 | -0.0211  | VdW_14_8_4 | -0.00114 | VdW_6_10_3   | 0.040079 | VdW_15_6_7   | -0.01701 |
| Ele_10_10_6 | -0.0695  | VdW_11_6_9  | -0.00885 | VdW_15_7_1 | -0.00256 | Ele_9_5_7    | 0.023652 | VdW_13_7_1_0 | -0.00519 |
| VdW_6_3_4   | -0.02976 | VdW_16_6_6  | 0.019747 | VdW_8_6_8  | -0.08609 | Ele_6_10_6   | 0.057891 | Ele_10_9_9   | -0.0231  |
| VdW_10_3_5  | 0.036318 | VdW_10_8_4  | -0.003   | VdW_7_5_5  | 0.020279 | VdW_11_2_6   | 0.003696 | VdW_13_5_9   | -0.01991 |
| VdW_6_8_7   | 0.045938 | VdW_11_12_  | 0.033126 | VdW_6_4_3  | -0.04199 | VdW_14_13_   | 0.024286 | Ele_7_11_7   | -0.02193 |

|             |          |             |          |             |          |             |          |             |          |
|-------------|----------|-------------|----------|-------------|----------|-------------|----------|-------------|----------|
|             |          | 8           |          |             |          | 6           |          |             |          |
| VdW_8_9_9   | -0.01589 | VdW_8_5_2   | -0.02357 | VdW_15_9_3  | -0.015   | VdW_9_4_5   | -0.04176 | Ele_7_5_4   | 0.070542 |
| VdW_10_10_5 | 0.025587 | VdW_9_12_2  | -0.0395  | VdW_6_6_2   | 0.026233 | VdW_4_6_3   | -0.02488 | VdW_10_14_8 | -0.02982 |
| VdW_11_5_3  | 0.07327  | Ele_8_10_8  | -0.01702 | VdW_10_6_4  | -0.01395 | Ele_11_11_7 | 0.039468 | VdW_14_10_4 | -0.01321 |
| VdW_13_5_4  | 0.031058 | VdW_9_6_9   | 0.036898 | VdW_5_11_8  | 0.038707 | VdW_10_3_9  | -0.02935 | VdW_8_7_10  | -0.0055  |
| VdW_6_5_3   | 0.029793 | VdW_5_7_8   | 0.032917 | VdW_13_11_2 | -0.00573 | VdW_10_10_4 | -0.07344 | VdW_16_4_6  | 0.034245 |
| Ele_11_6_8  | 0.01713  | VdW_17_9_5  | 0.006561 | VdW_13_8_3  | 0.031645 | VdW_5_7_3   | -0.01698 | VdW_12_2_5  | -0.04449 |
| VdW_14_5_2  | -0.01462 | VdW_13_6_4  | -0.05097 | VdW_14_6_10 | -0.00897 | VdW_11_7_3  | 0.055894 | VdW_9_6_8   | -0.04636 |
| VdW_11_11_1 | -0.00862 | VdW_8_3_4   | 0.032129 | VdW_6_5_4   | 0.009654 | Ele_14_9_7  | 0.02172  | Ele_8_5_4   | 0.037808 |
| VdW_14_9_9  | 0.061212 | VdW_13_12_6 | 0.013043 | VdW_15_11_8 | 0.082427 | VdW_3_9_8   | 0.046042 | VdW_5_4_8   | 0.000448 |

|             |          |             |          |            |          |             |          |             |          |
|-------------|----------|-------------|----------|------------|----------|-------------|----------|-------------|----------|
| Ele_10_6_7  | 0.065557 | VdW_14_10_8 | -0.0619  | VdW_8_6_9  | 0.044025 | VdW_14_11_5 | -0.05308 | VdW_16_7_3  | -0.01797 |
| VdW_14_7_4  | -0.06116 | VdW_4_6_8   | -0.01304 | VdW_10_5_3 | 0.005374 | Ele_13_6_5  | -0.03311 | VdW_5_6_6   | -0.01302 |
| VdW_8_10_4  | -0.06068 | VdW_8_5_7   | -0.00761 | VdW_11_5_8 | -0.0427  | VdW_15_12_5 | -0.00511 | VdW_15_4_8  | 0.041746 |
| Ele_11_6_6  | 0.10216  | VdW_7_5_2   | 0.04487  | VdW_6_6_6  | 0.064113 | VdW_17_6_7  | -0.01071 | VdW_11_2_5  | -0.04012 |
| VdW_6_11_4  | 0.018043 | VdW_13_10_4 | 0.050683 | VdW_9_5_9  | 0.030469 | Ele_13_10_5 | 0.042438 | VdW_16_6_9  | -0.02386 |
| VdW_14_8_5  | 0.023467 | VdW_14_6_4  | 0.008254 | VdW_19_7_6 | -0.03451 | Ele_5_8_5   | -0.03561 | VdW_13_12_9 | -0.04901 |
| VdW_11_6_4  | 0.000644 | Ele_9_6_8   | -0.02136 | VdW_13_4_3 | -0.03419 | VdW_10_6_8  | -0.03929 | VdW_5_9_9   | -0.01005 |
| VdW_13_11_8 | 0.000244 | VdW_14_10_3 | -0.04918 | VdW_8_5_5  | -0.02891 | VdW_5_4_4   | -0.00647 | VdW_8_4_4   | -0.05669 |
| VdW_16_7_2  | 0.022453 | VdW_7_4_6   | 0.019145 | VdW_6_3_7  | -0.03904 | VdW_4_9_2   | 0.029196 | VdW_10_6_   | 0.024279 |

|            |          |             |          |             |          |             |          |             |          |
|------------|----------|-------------|----------|-------------|----------|-------------|----------|-------------|----------|
| VdW_7_5_8  | -0.01435 | VdW_4_11_4  | 0.046972 | VdW_11_8_2  | 0.018899 | VdW_4_10_8  | 0.028801 | VdW_9_10_8  | -0.00784 |
| VdW_11_8_9 | 0.001015 | VdW_13_11_3 | -0.01342 | VdW_6_12_5  | 0.015439 | VdW_10_12_1 | 0.030477 | VdW_6_12_3  | -0.05737 |
| VdW_6_5_2  | -0.03513 | VdW_15_4_6  | -0.00396 | VdW_12_13_4 | -0.00962 | VdW_13_11_5 | 0.037858 | VdW_16_7_4  | -0.00685 |
| VdW_9_10_4 | 0.030595 | VdW_14_7_7  | 0.049233 | VdW_8_12_3  | -0.00793 | VdW_4_5_4   | -0.054   | VdW_10_12_2 | -0.01907 |
| VdW_14_3_8 | -0.0225  | VdW_6_9_6   | -0.07876 | VdW_13_8_9  | 0.031795 | VdW_16_5_5  | -0.04759 |             |          |
| VdW_11_6_1 | -0.02319 | VdW_8_13_3  | 0.010508 | VdW_11_4_4  | -0.01407 | VdW_9_4_4   | 0.027477 | Ele_14_9_8  | 0.034244 |
| Ele_11_6_1 | 0.052014 | VdW_12_6_1  | -0.03382 | VdW_12_3_3  | 0.002549 | VdW_17_6_4  | 0.00158  | VdW_14_8_9  | -0.02597 |
| VdW_14_6_1 | 0.01338  | VdW_14_10_5 | 0.009333 | VdW_6_3_6   | 0.024729 | VdW_15_12_8 | -0.05784 | VdW_14_12_7 | 0.020695 |
| VdW_7_4_2  | -0.02712 | VdW_13_12_5 | -0.03858 | Ele_9_10_8  | -0.05128 | VdW_16_4_8  | -0.00418 | VdW_3_9_5   | -0.03601 |
| VdW_10_7_1 | 0.007108 | VdW_4_10_4  | -0.00534 | Ele_13_8_4  | 0.082442 | VdW_16_5_6  | -0.01626 | VdW_3_7_2   | 0.002863 |

|             |          |             |          |            |          |             |          |             |          |
|-------------|----------|-------------|----------|------------|----------|-------------|----------|-------------|----------|
| 1           |          |             |          |            |          |             |          |             |          |
| Ele_7_3_2   | 0.022777 | VdW_10_11_5 | 0.037783 | VdW_16_5_4 | -0.00585 | VdW_14_4_3  | -0.00803 | VdW_7_11_7  | -0.03367 |
| VdW_15_6_1  | 0.011249 | VdW_8_9_1   | -0.05559 | Ele_8_9_4  | -0.03796 | VdW_6_10_10 | -0.01538 | VdW_9_4_2   | 0.005881 |
| VdW_12_12_2 | 3.20E-05 | VdW_3_6_4   | -0.05033 | VdW_13_6_9 | -0.01585 | VdW_15_7_8  | -0.00374 | VdW_15_8_4  | 0.073266 |
| VdW_7_10_6  | 0.042993 | VdW_16_12_5 | -0.00205 | VdW_14_7_5 | -0.06145 | VdW_3_10_8  | 0.02699  | Ele_7_6_8   | -0.12182 |
| VdW_12_6_7  | -0.02615 | VdW_10_8_9  | -0.02489 | VdW_7_8_8  | 0.001854 | VdW_14_9_4  | 0.04614  | VdW_10_4_6  | -0.02498 |
| VdW_14_9_6  | 0.013761 | VdW_16_11_3 | -0.01566 | VdW_16_7_5 | -0.02397 | VdW_13_13_8 | -0.04201 | VdW_14_7_2  | 0.023394 |
| VdW_15_6_3  | -0.02464 | VdW_17_10_7 | 0.008169 | Ele_15_9_6 | 0.00614  | VdW_9_11_5  | -0.00624 | VdW_11_12_3 | 0.053148 |
| VdW_7_10_3  | 0.016903 | VdW_6_7_5   | 0.092958 | VdW_14_6_2 | -0.05318 | VdW_9_11_7  | -0.01994 | Ele_12_9_3  | 0.100681 |

|             |          |             |          |             |          |             |          |             |          |
|-------------|----------|-------------|----------|-------------|----------|-------------|----------|-------------|----------|
| VdW_9_2_4   | -0.00758 | VdW_15_13_6 | 0.034699 | VdW_14_10_9 | 0.015685 | VdW_9_12_4  | 0.001659 | VdW_10_11_7 | 0.030572 |
| Ele_11_8_8  | -0.05137 | VdW_10_10_7 | -0.0507  | VdW_4_10_3  | -0.01534 | VdW_9_2_5   | -0.01193 | VdW_7_11_5  | -0.06783 |
| VdW_13_8_4  | 0.004493 | VdW_16_6_4  | -0.01628 | Ele_6_9_6   | -0.00384 | VdW_14_7_3  | 0.027957 | VdW_17_5_5  | 0.007971 |
| Ele_10_8_8  | 0.017999 | VdW_13_3_4  | -0.03027 | VdW_8_11_9  | 0.032608 | VdW_12_4_5  | -0.00553 | VdW_8_13_6  | 0.005196 |
| VdW_13_9_8  | 0.029874 | VdW_10_6_7  | 0.01496  | VdW_8_2_5   | 0.00278  | Ele_11_7_9  | 0.009096 | VdW_8_5_6   | -0.03158 |
| VdW_17_7_4  | 0.013768 | VdW_15_5_8  | -0.00942 | VdW_4_4_5   | -0.0012  | Ele_12_11_7 | 0.104709 | Ele_6_7_5   | -0.03572 |
| VdW_11_8_3  | 0.007514 | VdW_14_7_6  | -0.02126 | Ele_13_8_8  | 0.091257 | VdW_7_12_3  | -0.00445 | VdW_15_11_5 | -0.02297 |
| VdW_13_10_5 | 0.02     | VdW_7_12_6  | 0.106322 | Ele_14_8_6  | -0.01146 | VdW_15_9_4  | 0.034808 | Ele_12_6_4  | -0.08063 |
| VdW_3_10_4  | -0.01048 | VdW_12_12_8 | -0.01674 | VdW_9_7_9   | 0.007465 | VdW_13_11_6 | 0.057986 | VdW_9_11_6  | 0.005013 |

|             |          |             |          |             |          |             |          |             |          |
|-------------|----------|-------------|----------|-------------|----------|-------------|----------|-------------|----------|
| VdW_9_10_5  | 0.006096 | VdW_16_11_8 | -0.06442 | VdW_9_11_8  | 0.032007 | Ele_11_9_3  | 0.086556 | VdW_9_8_3   | 0.012933 |
| VdW_7_7_8   | 0.129601 | VdW_9_5_5   | -0.0205  | VdW_5_5_8   | 0.029384 | VdW_16_5_3  | 0.083978 | VdW_10_5_2  | 0.024442 |
| VdW_11_6_7  | -0.00869 | VdW_14_7_1  | 0.065545 | VdW_12_10_9 | -0.0068  | VdW_6_4_9   | -0.02638 | Ele_10_11_5 | -0.03535 |
| Ele_14_6_1  | 0.020237 | VdW_8_8_9   | 0.031712 | VdW_6_8_4   | -0.05125 | VdW_13_13_4 | 0.002952 | VdW_11_4_8  | 0.023101 |
| VdW_10_10_6 | -0.08803 | VdW_7_3_4   | 0.062339 | VdW_4_6_4   | 0.008043 | VdW_7_5_7   | -0.05006 | Ele_6_6_3   | -0.067   |
| Ele_9_9_8   | -0.04923 | VdW_12_11_7 | -0.00958 | VdW_13_5_5  | -0.01582 | VdW_6_12_4  | -0.00198 | Ele_10_5_6  | 0.074456 |
| VdW_8_10_8  | 0.051595 | VdW_5_7_9   | -0.03017 | VdW_14_8_7  | -0.02435 | VdW_18_10_8 | -0.00991 | VdW_11_8_10 | -0.00024 |
| VdW_12_6_4  | 0.025405 | VdW_7_9_9   | -0.04607 | VdW_16_4_5  | 0.067935 | VdW_6_10_6  | -0.01786 | VdW_13_5_3  | -0.00584 |
| VdW_7_6_9   | -0.02842 | VdW_7_10_8  | 0.014576 | VdW_7_10_7  | 0.028004 | VdW_9_10_3  | -0.04895 | Ele_9_8_9   | 0.012306 |
| VdW_11_9_9  | -0.02153 | VdW_4_11_5  | -0.03034 | Ele_5_9_8   | -0.08473 | Ele_10_11_6 | -0.02385 | VdW_14_7_8  | -0.00106 |

|            |          |             |          |            |          |             |          |             |          |
|------------|----------|-------------|----------|------------|----------|-------------|----------|-------------|----------|
| 8          |          |             |          |            |          |             |          |             |          |
| VdW_9_8_4  | 0.016249 | Ele_9_10_5  | 0.030349 | Ele_5_9_6  | -0.05554 | VdW_10_5_5  | -0.00566 | VdW_7_4_3   | 0.024525 |
| Ele_12_9_8 | 0.047995 | Ele_7_6_7   | -0.04472 | VdW_6_4_6  | -0.00288 | VdW_10_2_6  | 0.002439 | Ele_6_6_5   | -0.01776 |
| VdW_13_3_3 | -0.02506 | VdW_12_5_6  | 0.01286  | VdW_17_6_8 | -0.04162 | VdW_7_11_3  | 0.003935 | VdW_5_7_5   | 0.079474 |
| VdW_10_7_4 | 0.018873 | Ele_10_10_8 | -0.00774 | Ele_12_6_5 | -0.10601 | VdW_10_2_5  | 0.007845 | VdW_10_10_1 | -0.01923 |
| VdW_12_6_5 | 0.03407  | VdW_7_9_4   | -0.04102 | VdW_6_7_8  | -0.02123 | VdW_7_12_7  | 0.090875 | VdW_13_12_4 | 0.005942 |
| VdW_9_9_8  | -0.05668 | VdW_15_6_9  | 0.030328 | VdW_7_7_4  | 0.019232 | VdW_4_5_5   | 0.011406 | VdW_4_8_2   | -0.01491 |
| VdW_9_10_6 | 0.004122 | Ele_9_6_5   | -0.03307 | VdW_6_8_10 | 0.011102 | VdW_14_9_8  | -0.02589 | Ele_8_7_3   | 0.042849 |
| VdW_5_11_4 | 0.025373 | Ele_14_10_5 | 0.020691 | VdW_6_3_8  | -0.01008 | VdW_5_5_2   | 0.025243 | VdW_7_13_4  | -0.04173 |
| VdW_3_7_4  | -0.00847 | VdW_14_5_10 | 0.042617 | VdW_14_7_9 | -0.02536 | VdW_10_11_6 | -0.05166 | VdW_11_12_5 | -0.06487 |
| VdW_7_6_7  | 0.074581 | VdW_6_5_9   | 0.008806 | Ele_13_6_8 | -0.0323  | VdW_6_10_5  | -0.05481 | VdW_11_13_  | 0.019081 |

|             |          |             |          |             |          |              |          |             |          |
|-------------|----------|-------------|----------|-------------|----------|--------------|----------|-------------|----------|
|             |          |             |          |             |          |              |          | 5           |          |
| Ele_10_10_7 | -0.10978 | VdW_14_5_3  | 0.025384 | Ele_10_11_7 | 0.117522 | Ele_14_7_9   | -0.07839 | VdW_5_5_7   | 0.023837 |
| Ele_9_10_7  | -0.01675 | VdW_5_4_5   | 0.038465 | Ele_8_10_4  | -0.058   | VdW_11_10_3  | -0.0375  | Ele_11_6_4  | 0.011839 |
| VdW_7_6_3   | -0.04721 | VdW_8_12_8  | 0.050856 | VdW_14_4_8  | -0.04816 | VdW_12_7_9   | 0.037715 | Ele_11_11_8 | 0.063261 |
| VdW_18_5_7  | -0.00989 | VdW_12_11_5 | 0.009752 | VdW_6_6_10  | 0.064904 | VdW_7_5_6    | 0.079008 | Ele_8_9_9   | 0.018228 |
| VdW_12_9_8  | -0.00636 | VdW_8_4_2   | -0.01689 | VdW_6_9_4   | 0.017265 | VdW_12_5_10  | 0.029541 | VdW_10_6_11 | -0.07249 |
| VdW_13_4_7  | 0.079199 | VdW_8_9_4   | -0.03715 | Ele_11_10_8 | -0.00539 | VdW_12_11_10 | -0.00806 | Ele_12_6_8  | 0.03681  |
| VdW_10_12_8 | 0.005151 | VdW_12_6_8  | 0.035088 | VdW_4_12_5  | -0.0021  | VdW_5_10_8   | 0.036389 | VdW_10_14_5 | 0.009965 |
| VdW_9_10_7  | 0.092476 | VdW_14_9_5  | -0.00737 | VdW_13_4_6  | 0.003349 | Ele_13_7_4   | -0.03002 | VdW_5_6_4   | 0.017345 |
| VdW_14_10_6 | 0.030869 | VdW_3_7_5   | -0.01192 | Ele_13_9_4  | 0.121992 | VdW_9_7_3    | -0.05988 | VdW_14_9_10 | 0.01928  |

|             |          |             |          |              |          |            |          |              |          |
|-------------|----------|-------------|----------|--------------|----------|------------|----------|--------------|----------|
| VdW_7_10_9  | -0.00725 | VdW_7_3_3   | -0.03783 | VdW_3_9_4    | 0.038514 | Ele_7_7_4  | -0.02896 | Ele_15_9_2   | 0.016164 |
| VdW_9_9_4   | 0.059677 | VdW_14_11_8 | 0.021418 | VdW_4_7_4    | -0.02119 | VdW_15_3_5 | 0.088176 | VdW_13_10_10 | 0.008846 |
| Ele_9_10_6  | 0.006763 | Ele_13_9_8  | 0.012421 | Ele_9_5_6    | 0.114871 | Ele_8_7_4  | 0.039814 | VdW_6_3_5    | 0.011424 |
| VdW_11_10_4 | -0.03934 | VdW_17_10_4 | -0.06587 | VdW_13_5_6   | -0.09706 | Ele_9_5_5  | 0.021388 | VdW_16_8_5   | 0.005987 |
| VdW_14_9_7  | 0.001654 | Ele_14_7_5  | -0.00984 | VdW_11_11_11 | 0.029345 | VdW_3_11_6 | -0.00574 | Ele_14_9_2   | 0.068282 |
| VdW_6_8_6   | -0.01532 | VdW_12_5_4  | 0.037213 | VdW_5_6_5    | -0.0652  | VdW_5_11_3 | -0.00241 | Ele_12_9_9   | 0.047341 |
| VdW_13_7_8  | -0.00704 | Ele_7_10_6  | 0.089658 | VdW_17_10_5  | 0.007778 | VdW_16_9_7 | -0.01154 | VdW_16_10_5  | 0.014479 |
| VdW_11_8_8  | -0.03026 | VdW_17_7_5  | 0.023258 | Ele_13_10_8  | 0.058635 | VdW_9_3_4  | 0.00886  | Ele_9_11_8   | -0.0066  |
| VdW_13_10_3 | -0.03733 | VdW_14_10_7 | 0.040667 | Ele_15_7_6   | -0.01663 | VdW_12_3_8 | -0.00454 | Ele_11_5_6   | 0.063883 |
| VdW_11_6_   | -0.0122  | VdW_8_7_9   | 0.039632 | Ele_7_10_7   | 0.051033 | VdW_8_6_11 | 0.018431 | Ele_12_11_6  | 0.077448 |

|             |          |            |          |             |          |             |          |             |          |
|-------------|----------|------------|----------|-------------|----------|-------------|----------|-------------|----------|
| 6           |          |            |          |             |          |             |          |             |          |
| VdW_12_8_3  | -0.00975 | Ele_10_6_8 | 0.079589 | VdW_13_12_3 | -0.03089 | VdW_5_8_4   | 0.009359 | VdW_9_11_4  | -0.04587 |
| VdW_13_6_11 | 0.018804 | VdW_8_11_7 | -0.01846 | VdW_4_7_3   | 0.023936 | Ele_14_7_8  | -0.03882 | VdW_7_7_9   | 0.010905 |
| VdW_10_2_4  | 0.046579 | VdW_6_9_9  | -0.02932 | Ele_14_8_5  | -0.04485 | Ele_13_11_6 | -0.0428  | VdW_17_9_8  | -0.03097 |
| Ele_11_10_7 | 0.060948 | VdW_6_7_3  | 0.015831 | VdW_8_5_4   | 0.073955 | VdW_6_8_8   | -0.01454 | Ele_9_8_3   | 0.049676 |
| VdW_14_10_2 | -0.00233 | Ele_12_6_7 | 0.023449 | VdW_14_9_3  | 0.055369 | VdW_5_7_10  | 0.02466  | VdW_7_12_8  | 0.037457 |
| VdW_15_11_4 | 0.07462  | VdW_12_5_3 | -0.00623 | Ele_10_5_7  | 0.013464 | VdW_13_4_5  | 0.04581  | Ele_11_11_6 | -0.01677 |
| VdW_11_9_3  | -0.07003 | VdW_3_10_5 | -0.0055  | VdW_6_12_7  | 0.048559 | VdW_16_7_9  | 0.002516 | VdW_4_6_9   | 0.00081  |
| VdW_13_6_8  | 0.031545 | VdW_15_4_5 | -0.00191 | Ele_14_8_8  | 0.013752 | VdW_13_5_2  | -0.02061 | Ele_13_6_9  | -0.05149 |
| VdW_11_10   | -0.06499 | VdW_6_9_7  | -0.01726 | VdW_6_11_8  | 0.031975 | VdW_12_2_8  | -0.04316 | VdW_7_2_6   | 0.012691 |

|             |          |              |          |             |          |              |          |            |          |
|-------------|----------|--------------|----------|-------------|----------|--------------|----------|------------|----------|
| _7          |          |              |          |             |          |              |          |            |          |
| VdW_10_10_8 | 0.008292 | VdW_14_10_10 | -0.03309 | VdW_13_11_4 | -0.04319 | VdW_11_5_5   | -0.0038  | VdW_3_11_8 | 0.023577 |
| VdW_6_7_2   | 0.004133 | VdW_5_5_9    | 0.004741 | VdW_9_5_4   | 0.029479 | VdW_11_4_5   | 0.015687 | VdW_10_4_7 | 0.010386 |
| Ele_9_8_4   | 0.0458   | VdW_8_11_6   | -0.044   | Ele_14_6_6  | 0.036626 | VdW_5_11_7   | 0.064196 | VdW_9_2_8  | -0.01416 |
| VdW_7_12_5  | 0.007544 | Ele_13_7_8   | -0.03181 | VdW_7_13_5  | 0.005334 | VdW_12_6_9   | 0.013591 | VdW_6_9_5  | -0.02337 |
| VdW_5_6_8   | -0.01878 | VdW_12_5_7   | -0.01385 | VdW_14_12_3 | 0.033793 | VdW_11_7_9   | 0.005302 | VdW_15_7_6 | -0.0098  |
| VdW_9_7_4   | 0.040788 | VdW_12_14_6  | -0.01179 | VdW_5_12_5  | -0.02606 | VdW_12_12_10 | 0.059875 | Ele_15_7_4 | 0.054503 |
| VdW_6_9_3   | -0.05908 | Ele_6_8_5    | -0.01469 | VdW_13_10_8 | 0.08015  | VdW_13_4_9   | -0.02064 | VdW_13_9_9 | -0.03444 |
| Ele_14_9_6  | 0.104807 | VdW_3_6_8    | -0.01055 | VdW_5_13_5  | 0.048774 | VdW_3_6_7    | 0.015522 | VdW_19_7_7 | 0.00375  |
| VdW_9_6_5   | -0.00393 | VdW_6_7_6    | 0.037342 | Ele_6_6_7   | -0.08246 | VdW_12_8_10  | 0.034708 | VdW_4_5_8  | 0.005412 |
| VdW_11_7_   | 0.132634 | VdW_11_11_   | 0.00352  | VdW_10_11_  | 0.025489 | VdW_4_12_8   | 0.036089 | VdW_6_11_6 | -0.0056  |

|             |          |             |          |             |          |             |          |             |          |
|-------------|----------|-------------|----------|-------------|----------|-------------|----------|-------------|----------|
| 4           |          | 9           |          | 2           |          |             |          |             |          |
| VdW_12_10_8 | 0.066226 | VdW_16_10_6 | -0.02282 | VdW_15_7_2  | -0.00158 | VdW_11_11_4 | 0.005698 | VdW_13_11_9 | -0.03038 |
| VdW_8_5_3   | -0.02    | Ele_11_9_9  | -0.06418 | Ele_5_11_5  | 0.043468 | VdW_10_5_6  | -0.0923  | VdW_9_11_11 | 0.014874 |
| Ele_13_6_7  | 0.045797 | VdW_5_10_3  | -0.02418 | VdW_8_12_4  | 0.036124 | VdW_3_4_4   | -0.01762 | VdW_11_6_8  | -0.02165 |
| VdW_7_9_8   | -0.0152  | VdW_14_12_5 | 0.002301 | VdW_9_3_5   | -0.00129 | VdW_15_10_7 | -0.11552 | Ele_12_3_3  | -0.04344 |
| VdW_10_6_5  | -0.06838 | Ele_10_6_5  | -0.07892 | VdW_16_10_4 | -0.04916 | VdW_16_5_7  | -0.02339 | Ele_14_7_1  | 0.018854 |
| VdW_13_10_7 | -0.02262 | VdW_11_11_7 | 0.051144 | VdW_15_10_9 | 0.01658  | VdW_3_11_5  | 0.0348   | VdW_5_8_2   | 0.003664 |
| VdW_7_11_8  | 0.005973 | VdW_10_4_8  | 0.034292 | VdW_16_11_5 | -0.05706 | VdW_15_6_10 | -0.00604 | Ele_8_4_6   | 0.087807 |
| VdW_13_6_5  | -0.0114  | VdW_8_5_9   | 0.020413 | VdW_7_4_5   | -0.05428 | VdW_13_7_9  | 0.002785 | VdW_10_12_5 | -0.01821 |
| VdW_10_8_   | -0.05384 | VdW_6_8_5   | -0.00088 | VdW_17_10_  | -0.02321 | VdW_4_11_6  | 0.063907 | VdW_14_13_  | 0.041046 |

|             |          |              |          |             |          |             |          |             |          |
|-------------|----------|--------------|----------|-------------|----------|-------------|----------|-------------|----------|
| 8           |          |              |          | 8           |          |             |          | 8           |          |
| VdW_9_11_1  | 0.009326 | Ele_11_6_7   | -0.06202 | Ele_9_11_6  | -0.01421 | VdW_15_9_6  | -0.04169 | VdW_10_12_6 | -0.03321 |
| VdW_14_12_6 | -0.00625 | VdW_11_11_8  | 0.019522 | VdW_11_10_8 | -0.02347 | Ele_9_7_4   | 0.024844 | VdW_9_13_4  | -0.03828 |
| VdW_7_10_2  | 0.03287  | Ele_14_9_5   | 0.103537 | VdW_7_5_10  | 0.050956 | VdW_12_7_3  | 0.027509 | VdW_15_5_2  | 0.023632 |
| VdW_6_7_9   | -0.08224 | Ele_10_10_5  | -0.05469 | VdW_14_11_4 | -0.01502 | VdW_14_4_4  | 0.004686 | Ele_12_11_5 | 0.014649 |
| VdW_13_6_7  | -0.0218  | VdW_9_11_3   | 0.006155 | VdW_2_6_3   | 0.028047 | Ele_13_5_7  | -0.04282 | Ele_9_9_4   | -0.00054 |
| Ele_11_6_5  | 0.002139 | VdW_12_9_3   | -0.0985  | Ele_10_9_4  | -0.00731 | VdW_15_6_5  | 0.10252  | VdW_8_3_8   | 0.04341  |
| VdW_7_4_7   | -0.00068 | Ele_12_10_8  | -0.00514 | VdW_15_9_10 | -0.00318 | Ele_10_11_4 | 0.079802 | VdW_10_3_3  | -0.03248 |
| VdW_14_8_6  | 0.06827  | VdW_15_10_10 | -0.01052 | VdW_4_11_8  | -0.05057 | VdW_12_5_8  | -0.04597 | VdW_6_8_2   | -0.02215 |
| VdW_12_5_   | 0.025903 | VdW_15_11_   | 0.007213 | VdW_6_5_7   | -0.02833 | VdW_8_8_3   | -0.03665 | Ele_7_11_6  | 0.141463 |

|             |          |             |          |            |          |             |          |             |          |
|-------------|----------|-------------|----------|------------|----------|-------------|----------|-------------|----------|
| 9           |          | 3           |          |            |          |             |          |             |          |
| VdW_10_5_9  | 0.124453 | VdW_5_12_8  | -0.0532  | VdW_14_6_3 | 0.03808  | VdW_6_6_7   | 0.121993 | VdW_7_4_9   | 0.055978 |
| VdW_16_10_3 | 0.077293 | VdW_14_5_9  | -0.01439 | VdW_13_5_8 | 0.069762 | VdW_10_9_4  | -0.05585 | VdW_13_7_3  | -0.00633 |
| VdW_16_6_3  | 0.018924 | Ele_4_5_2   | -0.0343  | VdW_5_7_2  | -0.00643 | VdW_7_3_8   | 0.048355 | VdW_4_8_4   | -0.01598 |
| VdW_7_6_8   | 0.00763  | VdW_12_9_9  | 0.056676 | Ele_14_8_7 | 0.063174 | VdW_6_13_6  | -0.07895 | Ele_10_12_5 | 0.024482 |
| VdW_4_11_3  | 0.020847 | VdW_11_5_9  | 0.036538 | VdW_11_5_7 | -0.00557 | VdW_15_9_9  | 0.009966 | VdW_13_6_3  | -0.02378 |
| VdW_10_6_6  | -0.01311 | VdW_12_11_6 | 0.054557 | Ele_9_9_9  | -0.00054 | VdW_6_6_5   | 0.076257 | Ele_15_6_6  | -0.01528 |
| VdW_8_7_4   | -0.02968 | VdW_14_6_8  | -0.00973 | Ele_7_8_8  | 0.005536 | VdW_6_10_9  | 0.015883 | Ele_15_6_5  | -0.06638 |
| VdW_13_9_4  | 0.013932 | Ele_10_9_8  | 0.066048 | VdW_4_12_6 | -0.04392 | VdW_15_10_5 | 0.03947  | VdW_4_5_2   | 0.0064   |
| VdW_10_9_8  | -0.07677 | VdW_13_10_9 | -0.01896 | VdW_10_2_8 | -0.06227 | VdW_6_8_9   | -0.01485 | VdW_12_14_4 | 0.00268  |

|             |          |             |          |             |          |             |          |             |          |
|-------------|----------|-------------|----------|-------------|----------|-------------|----------|-------------|----------|
| VdW_6_12_6  | 0.044796 | VdW_3_13_6  | -0.00728 | VdW_12_3_6  | 0.025661 | VdW_14_11_9 | 0.024148 | VdW_13_9_2  | 0.012141 |
| VdW_11_7_10 | 0.012431 | VdW_9_5_7   | -0.02833 | VdW_15_10_3 | 0.007166 | VdW_2_11_5  | -0.00797 | Ele_11_10_9 | 0.001562 |
| VdW_14_6_5  | -0.03121 | VdW_9_3_9   | -0.10129 | VdW_9_12_3  | 0.014752 | VdW_15_8_5  | -0.01052 | Ele_14_8_4  | -0.01723 |
| Ele_10_6_6  | -0.08079 | VdW_7_3_2   | -0.00114 | VdW_11_11_5 | -0.0208  | Ele_11_10_5 | 0.03552  | Ele_5_9_7   | -0.04348 |
| VdW_9_12_8  | -0.02033 | VdW_12_11_9 | -0.01708 | VdW_10_15_3 | 0.02098  | Ele_11_11_5 | -0.0002  | Ele_11_5_7  | 0.076419 |
| Ele_14_7_7  | -0.04741 | VdW_7_8_9   | 0.085704 | VdW_10_11_3 | 0.042177 | VdW_15_8_3  | -0.00739 | Ele_6_7_6   | -0.02594 |
| VdW_13_8_8  | 0.020145 | VdW_5_8_9   | -0.04004 | Ele_8_5_5   | -0.00677 | VdW_11_12_4 | -0.0164  | Ele_9_10_4  | -0.08544 |
| VdW_14_5_8  | -0.02013 | VdW_12_5_5  | -0.01347 | VdW_14_3_5  | -0.00508 | Ele_7_7_3   | 0.070504 | Ele_14_7_4  | 0.074127 |
| VdW_8_2_8   | -0.01221 | VdW_8_11_5  | -0.00978 | VdW_10_9_9  | -0.08838 | VdW_9_4_7   | -0.09581 | Ele_7_6_3   | -0.00112 |

|             |          |             |          |              |          |             |          |             |          |
|-------------|----------|-------------|----------|--------------|----------|-------------|----------|-------------|----------|
| VdW_16_6_5  | 0.002957 | VdW_9_8_9   | 0.020925 | VdW_5_5_3    | -0.06823 | Ele_13_6_4  | -0.02058 | VdW_10_11_4 | -0.02327 |
| VdW_6_4_8   | -0.02259 | VdW_11_11_6 | -0.09669 | VdW_15_7_9   | 0.027974 | Ele_6_4_2   | 0.048962 | VdW_2_7_6   | -0.00334 |
| VdW_12_11_2 | 0.021601 | VdW_8_6_4   | 0.020366 | VdW_12_4_4   | -0.04203 | VdW_10_5_8  | 0.012572 | VdW_7_5_9   | -0.02593 |
| VdW_14_11_3 | 0.013253 | VdW_14_6_7  | -0.0125  | VdW_9_14_6   | -0.00316 | VdW_5_9_4   | -0.04356 | VdW_13_13_6 | -0.02473 |
| Ele_6_8_7   | 0.049656 | VdW_11_5_6  | 0.021752 | Ele_13_10_7  | -0.03644 | VdW_6_6_4   | -0.05309 | Ele_10_8_9  | -0.04586 |
| VdW_10_5_7  | -0.00773 | Ele_6_9_7   | 0.089309 | Ele_6_9_8    | -0.01086 | Ele_14_5_6  | -0.10626 | VdW_9_4_9   | 0.026017 |
| VdW_15_6_2  | -0.02601 | VdW_15_7_5  | 0.049821 | VdW_18_7_9   | -0.04496 | VdW_4_7_9   | 0.00158  | Ele_7_8_2   | -0.01991 |
| VdW_9_10_1  | -0.05508 | VdW_8_4_9   | -0.03121 | Ele_7_7_8    | -0.02957 | VdW_12_12_3 | 0.005334 | VdW_15_9_5  | 0.005068 |
| VdW_13_7_4  | -0.02469 | VdW_8_11_8  | 0.019842 | VdW_10_11_10 | 0.037475 | VdW_10_4_2  | -0.06626 | Ele_14_10_6 | 0.021585 |

|             |          |             |          |            |          |             |          |             |          |
|-------------|----------|-------------|----------|------------|----------|-------------|----------|-------------|----------|
| VdW_7_10_4  | -0.06986 | VdW_8_10_9  | 0.001088 | VdW_2_10_4 | 0.004738 | VdW_7_6_2   | 0.025392 | VdW_6_5_6   | 0.091778 |
| VdW_8_13_4  | -0.00397 | VdW_11_2_8  | 0.024532 | VdW_14_9_2 | 0.033147 | VdW_10_4_5  | 0.04206  | Ele_6_8_6   | -0.01436 |
| VdW_14_12_8 | 0.042893 | VdW_4_8_5   | 0.016556 | Ele_9_12_4 | 0.032774 | VdW_2_12_8  | -0.01612 | VdW_10_11_8 | 0.006872 |
| VdW_14_8_8  | 0.053025 | VdW_12_2_6  | 0.028345 | Ele_6_7_8  | 0.020976 | VdW_14_7_10 | 0.036983 | VdW_9_4_3   | 0.005868 |
| VdW_12_10_4 | -0.06996 | VdW_7_6_4   | -0.02899 | Ele_11_9_8 | 0.00492  | VdW_5_6_7   | -0.02305 | Ele_13_10_4 | 0.087866 |
| VdW_11_10_5 | -0.00731 | VdW_3_7_8   | 0.015067 | Ele_6_7_7  | -0.0098  | Ele_7_9_8   | -0.01388 | Ele_5_5_5   | 0.010148 |
| VdW_7_5_4   | -0.07226 | VdW_11_6_5  | 0.040172 | VdW_6_7_7  | 0.108085 | VdW_8_13_5  | 0.03023  | Ele_5_7_5   | -0.02681 |
| VdW_10_8_3  | -0.05024 | VdW_6_6_8   | 0.003477 | VdW_6_7_4  | 0.008239 | Ele_12_5_6  | 0.034197 | VdW_10_8_2  | -0.01024 |
| VdW_10_7_9  | 0.099814 | VdW_17_11_6 | -0.0211  | VdW_14_8_4 | -0.00114 | VdW_6_10_3  | 0.040079 | VdW_15_6_7  | -0.01701 |

|             |          |             |          |             |          |             |          |             |          |
|-------------|----------|-------------|----------|-------------|----------|-------------|----------|-------------|----------|
| Ele_10_10_6 | -0.0695  | VdW_11_6_9  | -0.00885 | VdW_15_7_1  | -0.00256 | Ele_9_5_7   | 0.023652 | VdW_13_7_1  | -0.00519 |
|             |          |             |          |             |          |             |          | 0           |          |
| VdW_6_3_4   | -0.02976 | VdW_16_6_6  | 0.019747 | VdW_8_6_8   | -0.08609 | Ele_6_10_6  | 0.057891 | Ele_10_9_9  | -0.0231  |
| VdW_10_3_5  | 0.036318 | VdW_10_8_4  | -0.003   | VdW_7_5_5   | 0.020279 | VdW_11_2_6  | 0.003696 | VdW_13_5_9  | -0.01991 |
| VdW_6_8_7   | 0.045938 | VdW_11_12_8 | 0.033126 | VdW_6_4_3   | -0.04199 | VdW_14_13_6 | 0.024286 | Ele_7_11_7  | -0.02193 |
| VdW_8_9_9   | -0.01589 | VdW_8_5_2   | -0.02357 | VdW_15_9_3  | -0.015   | VdW_9_4_5   | -0.04176 | Ele_7_5_4   | 0.070542 |
| VdW_10_10_5 | 0.025587 | VdW_9_12_2  | -0.0395  | VdW_6_6_2   | 0.026233 | VdW_4_6_3   | -0.02488 | VdW_10_14_8 | -0.02982 |
| VdW_11_5_3  | 0.07327  | Ele_8_10_8  | -0.01702 | VdW_10_6_4  | -0.01395 | Ele_11_11_7 | 0.039468 | VdW_14_10_4 | -0.01321 |
| VdW_13_5_4  | 0.031058 | VdW_9_6_9   | 0.036898 | VdW_5_11_8  | 0.038707 | VdW_10_3_9  | -0.02935 | VdW_8_7_10  | -0.0055  |
| VdW_6_5_3   | 0.029793 | VdW_5_7_8   | 0.032917 | VdW_13_11_2 | -0.00573 | VdW_10_10_4 | -0.07344 | VdW_16_4_6  | 0.034245 |
| Ele_11_6_8  | 0.01713  | VdW_17_9_5  | 0.006561 | VdW_13_8_3  | 0.031645 | VdW_5_7_3   | -0.01698 | VdW_12_2_5  | -0.04449 |

|             |          |             |          |             |          |             |          |             |          |
|-------------|----------|-------------|----------|-------------|----------|-------------|----------|-------------|----------|
| VdW_14_5_2  | -0.01462 | VdW_13_6_4  | -0.05097 | VdW_14_6_10 | -0.00897 | VdW_11_7_3  | 0.055894 | VdW_9_6_8   | -0.04636 |
| VdW_11_11_1 | -0.00862 | VdW_8_3_4   | 0.032129 | VdW_6_5_4   | 0.009654 | Ele_14_9_7  | 0.02172  | Ele_8_5_4   | 0.037808 |
| VdW_14_9_9  | 0.061212 | VdW_13_12_6 | 0.013043 | VdW_15_11_8 | 0.082427 | VdW_3_9_8   | 0.046042 | VdW_5_4_8   | 0.000448 |
| Ele_10_6_7  | 0.065557 | VdW_14_10_8 | -0.0619  | VdW_8_6_9   | 0.044025 | VdW_14_11_5 | -0.05308 | VdW_16_7_3  | -0.01797 |
| VdW_14_7_4  | -0.06116 | VdW_4_6_8   | -0.01304 | VdW_10_5_3  | 0.005374 | Ele_13_6_5  | -0.03311 | VdW_5_6_6   | -0.01302 |
| VdW_8_10_4  | -0.06068 | VdW_8_5_7   | -0.00761 | VdW_11_5_8  | -0.0427  | VdW_15_12_5 | -0.00511 | VdW_15_4_8  | 0.041746 |
| Ele_11_6_6  | 0.10216  | VdW_7_5_2   | 0.04487  | VdW_6_6_6   | 0.064113 | VdW_17_6_7  | -0.01071 | VdW_11_2_5  | -0.04012 |
| VdW_6_11_4  | 0.018043 | VdW_13_10_4 | 0.050683 | VdW_9_5_9   | 0.030469 | Ele_13_10_5 | 0.042438 | VdW_16_6_9  | -0.02386 |
| VdW_14_8_5  | 0.023467 | VdW_14_6_4  | 0.008254 | VdW_19_7_6  | -0.03451 | Ele_5_8_5   | -0.03561 | VdW_13_12_9 | -0.04901 |

|             |          |             |          |             |          |             |          |             |          |
|-------------|----------|-------------|----------|-------------|----------|-------------|----------|-------------|----------|
| VdW_11_6_4  | 0.000644 | Ele_9_6_8   | -0.02136 | VdW_13_4_3  | -0.03419 | VdW_10_6_8  | -0.03929 | VdW_5_9_9   | -0.01005 |
| VdW_13_11_8 | 0.000244 | VdW_14_10_3 | -0.04918 | VdW_8_5_5   | -0.02891 | VdW_5_4_4   | -0.00647 | VdW_8_4_4   | -0.05669 |
| VdW_16_7_2  | 0.022453 | VdW_7_4_6   | 0.019145 | VdW_6_3_7   | -0.03904 | VdW_4_9_2   | 0.029196 | VdW_10_6_   | 0.024279 |
| VdW_7_5_8   | -0.01435 | VdW_4_11_4  | 0.046972 | VdW_11_8_2  | 0.018899 | VdW_4_10_8  | 0.028801 | VdW_9_10_8  | -0.00784 |
| VdW_11_8_9  | 0.001015 | VdW_13_11_3 | -0.01342 | VdW_6_12_5  | 0.015439 | VdW_10_12_1 | 0.030477 | VdW_6_12_3  | -0.05737 |
| VdW_6_5_2   | -0.03513 | VdW_15_4_6  | -0.00396 | VdW_12_13_4 | -0.00962 | VdW_13_11_5 | 0.037858 | VdW_16_7_4  | -0.00685 |
| VdW_9_10_4  | 0.030595 | VdW_14_7_7  | 0.049233 | VdW_8_12_3  | -0.00793 | VdW_4_5_4   | -0.054   | VdW_10_12_2 | -0.01907 |
| VdW_14_3_8  | -0.0225  | VdW_6_9_6   | -0.07876 | VdW_13_8_9  | 0.031795 | VdW_16_5_5  | -0.04759 |             |          |

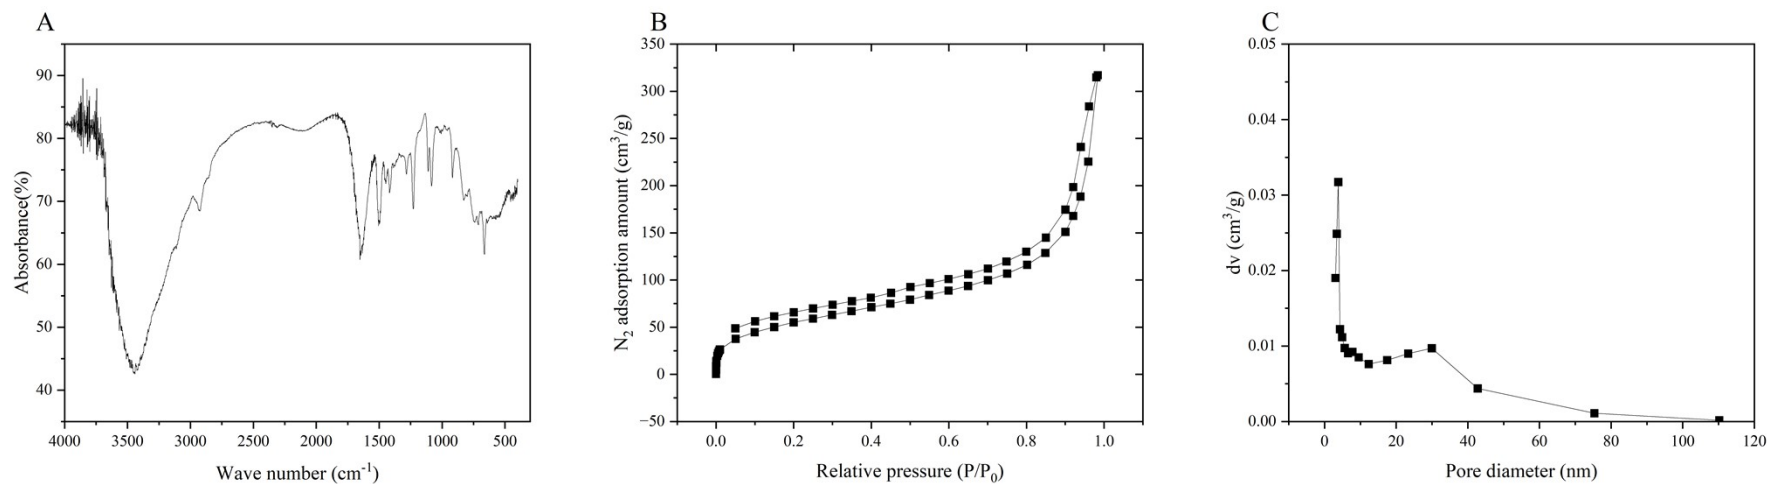

**Figure S1** Fourier Transform Infrared (A), N<sub>2</sub> adsorption-desorption isotherms (B) and pore size distribution curves (C) of synthesized solid phase microextraction coatings.

Note: Data were adapted from “Lei, S.; Liang, G.; Ding, M.; Sun, D.; Huang, Z.; Xie, M.-Y., A hydrophilic solid phase microextraction fiber for in vivo monitoring neonicotinoid insecticides in bean sprouts. *Microchemical Journal* **2025**, 215.”

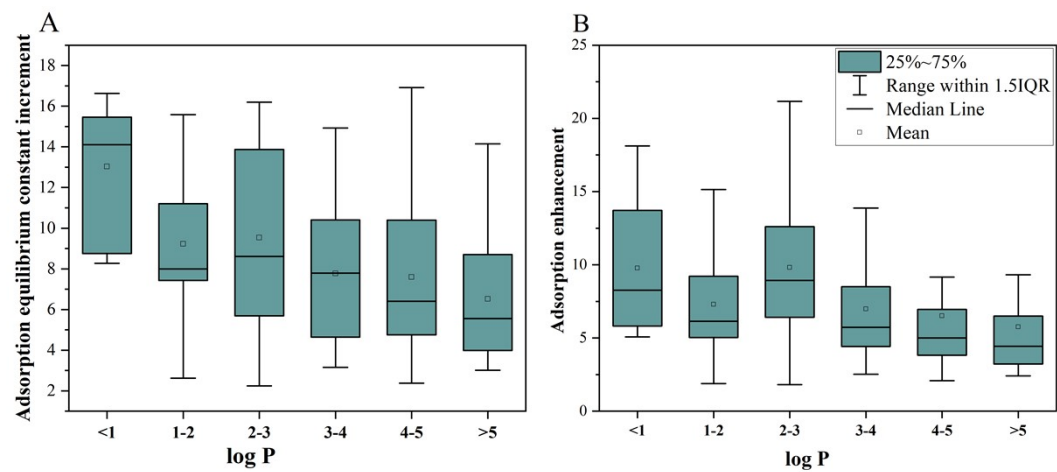

Figure S2. Increases in adsorption equilibrium constants of pesticides with varied hydrophobicity upon acetonitrile addition. Absolute increase

(A), relative increase factor (B)

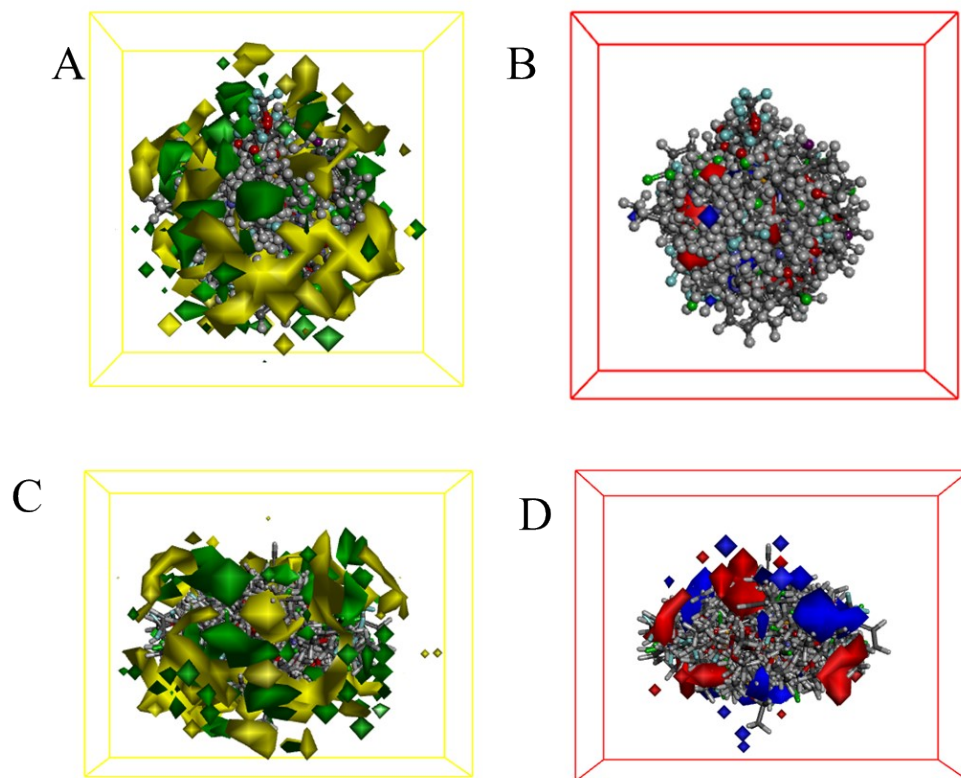

Figure S3. Three-dimensional grid representation of the pesticide model. Van der Waals fields (A, C) and electrostatic fields (B, D) correspond to pure water (A, B) and 1 µg/mL acetonitrile aqueous solution (C, D), respectively.
